# Supplementary material for: PDK1 regulates the survival of the developing cortical interneurons
Source: PubMed Central journal article supplement (PMC7197138; doi:10.1186/s13041-020-00604-6), 2020-05-04

## Raw Data Supplementary Materials

**Figure 1A Raw Data.** Relative mRNA level of *Pdk1* in the *Pdk1* cKO subpallium at E16.5. Quantified data was listed in Raw Data Excel sheet1. 3 pair brains from 3 different litters were analyzed.  $P=0.0004$ .

**Figure 1C-E Raw Data.** Immunostaining for GFP showed that the total number of cortical interneurons in the *Pdk1* cKO cortex was decreased at P6. 4 pair brains from 3 different litters were used for statistical analysis. Quantified data was listed in Raw Data Excel sheet2.  $P=0.0013$ . Scale bar, 100  $\mu\text{m}$ .

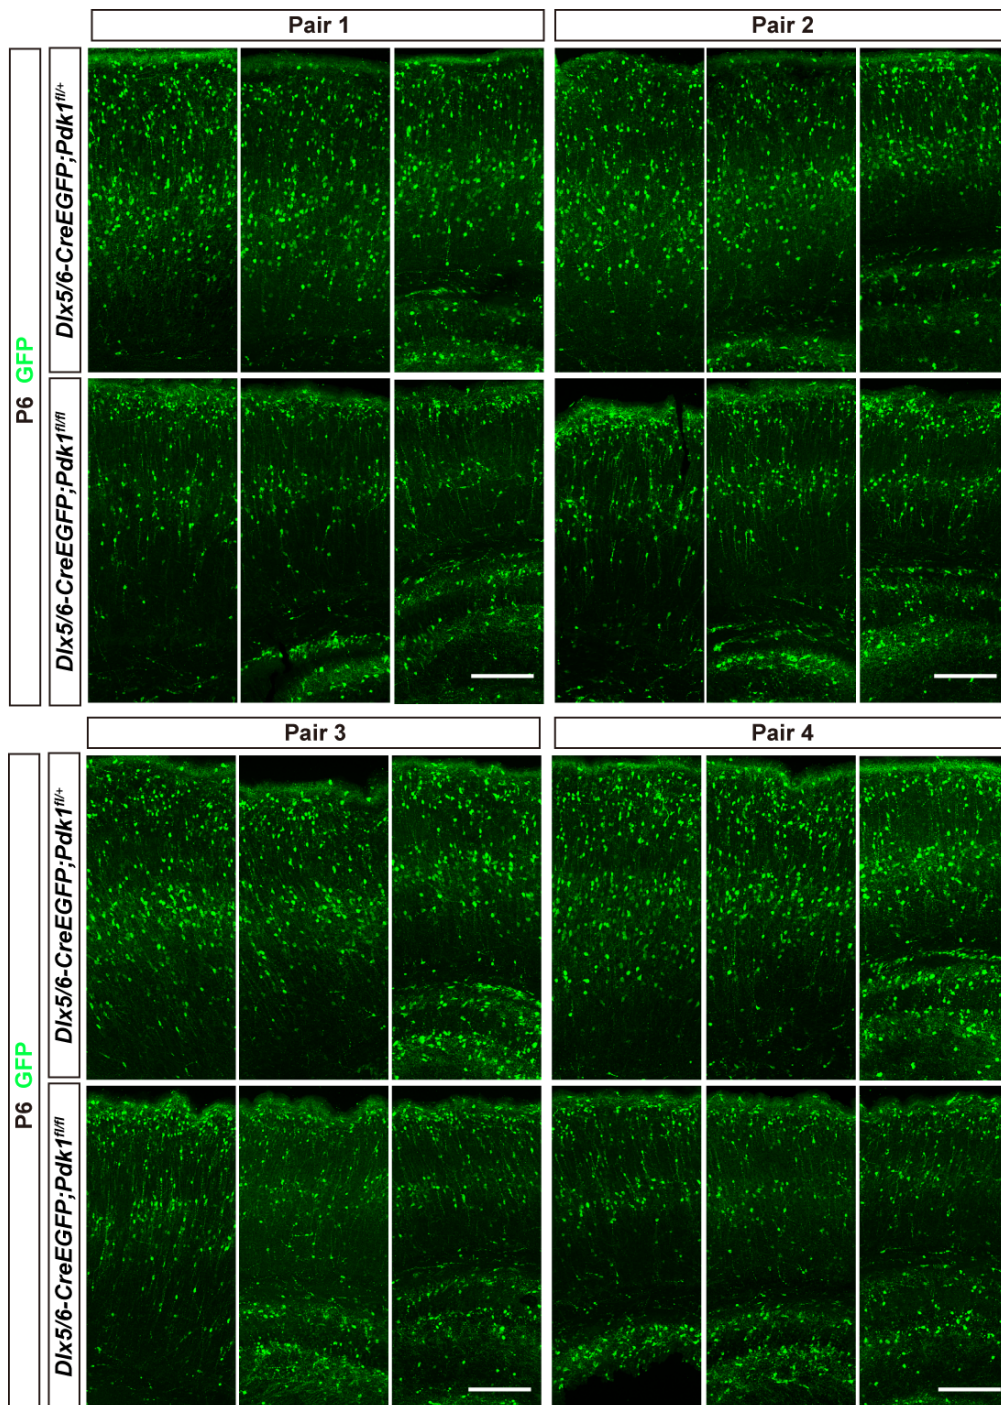

**Figure 1F-H Raw Data.** In situ hybridization of SST showed a reduction in SST<sup>+</sup> interneurons in the *Pdk1* cKO cortex at P6. 3 pair brains from 3 different litters were used for statistical analysis. Quantified data was listed in Raw Data Excel sheet3.  $P=0.0230$ . Scale bar, 100  $\mu\text{m}$ .

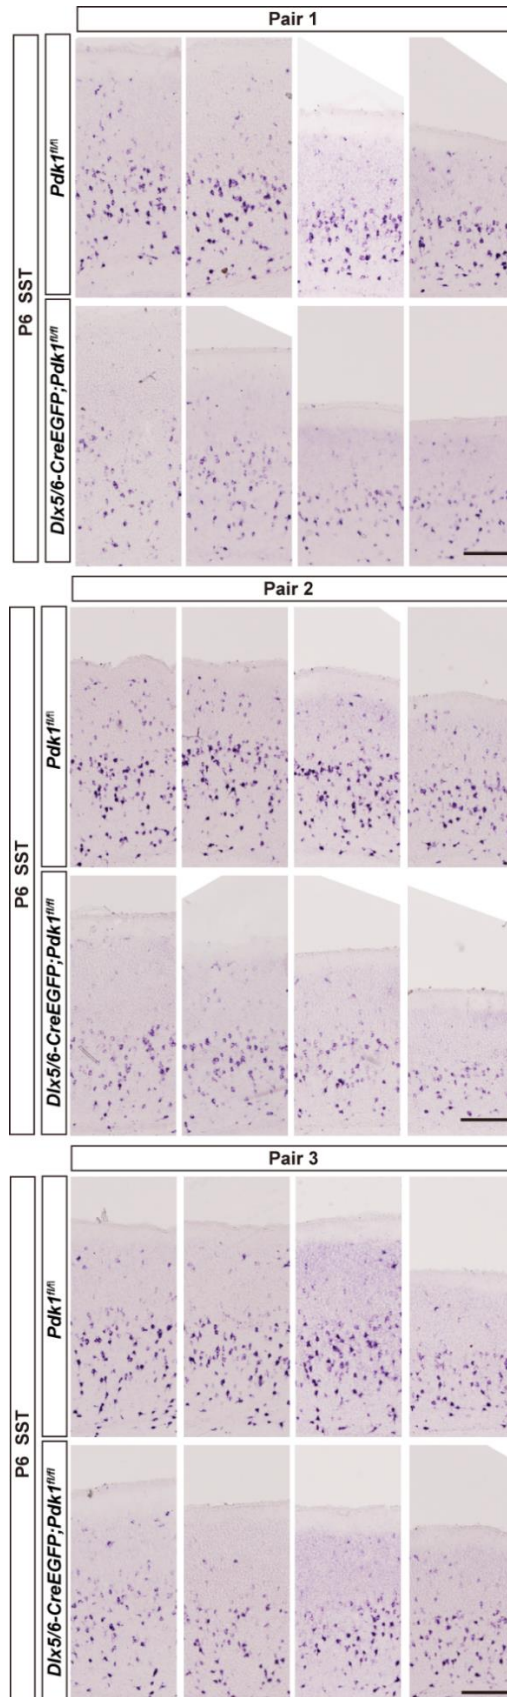

**Figure 11-K Raw Data.** In situ hybridization of PV showed a reduction in PV<sup>+</sup> interneurons in the *Pdk1* cKO cortex at P15. 4 pair brains from 3 different litters were used for statistical analysis. Quantified data was listed in Raw Data Excel sheet4.  $P=0.0013$ . Scale bar, 100  $\mu$ m.

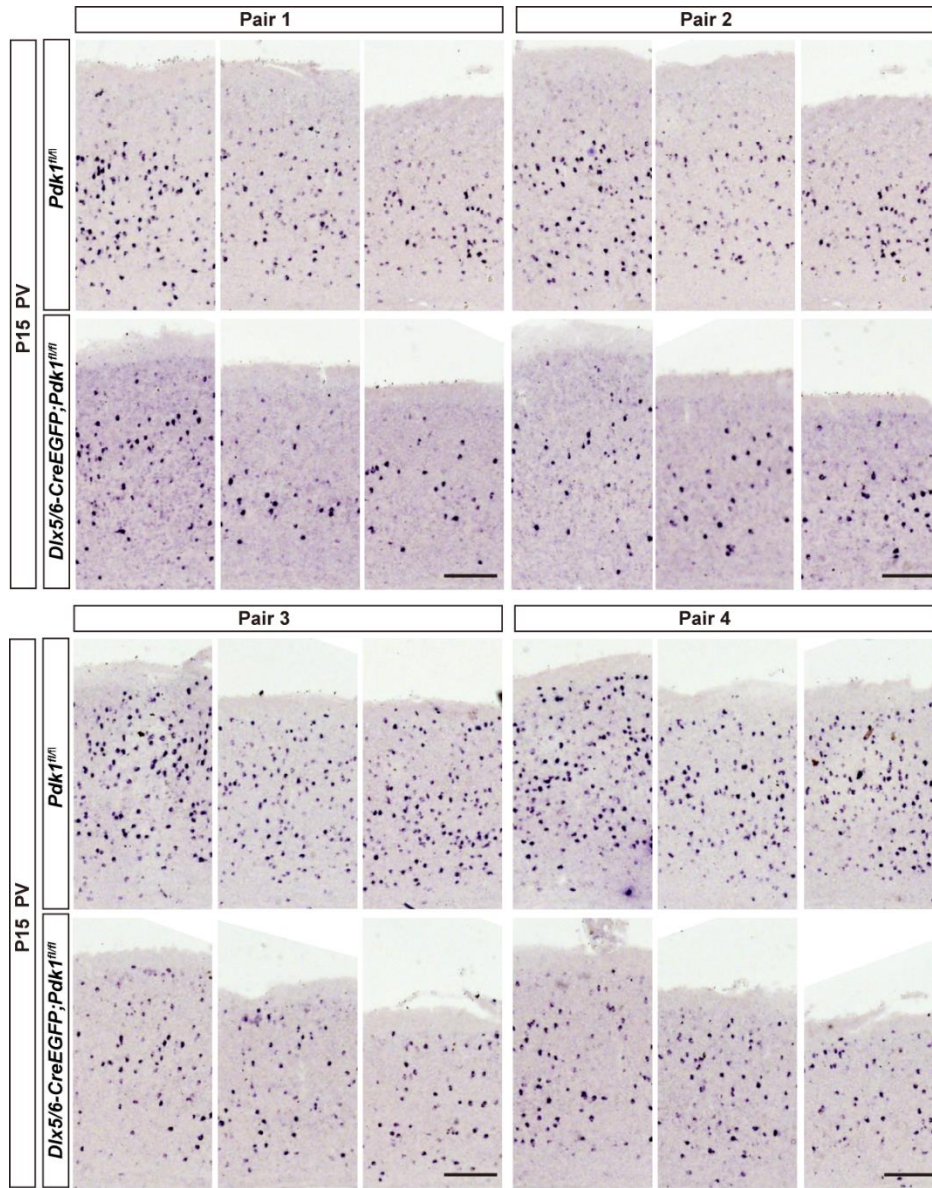

**Figure 1L-N Raw Data.** Immunostaining for PROX1 revealed that the number of CGE-derived cortical interneurons in the *Pdk1* cKO cortex was decreased at P6. 3 pair brains from 3 different litters were used for statistical analysis. Quantified data was listed in Raw Data Excel sheet5.  $P=0.0013$ . Scale bar, 100  $\mu\text{m}$ .

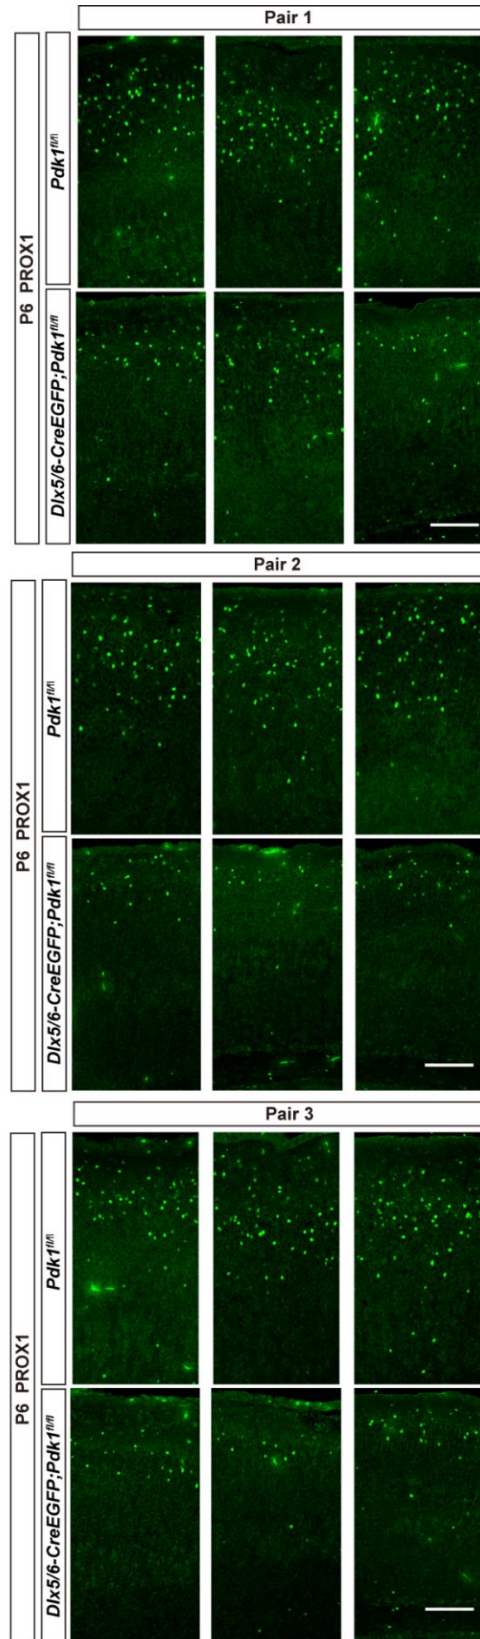

**Figure 2A-B Raw Data.** Immunofluorescence for GFP in coronal sections showed comparable distribution patterns and numbers of cortical interneurons at E12.5 between *Pdk1* cKO and control mice. 3 pair brains from 3 different litters were used for statistical analysis. Quantified data was listed in Raw Data Excel sheet6.  $P = 0.9912$ . Scale bar, 100  $\mu\text{m}$ .

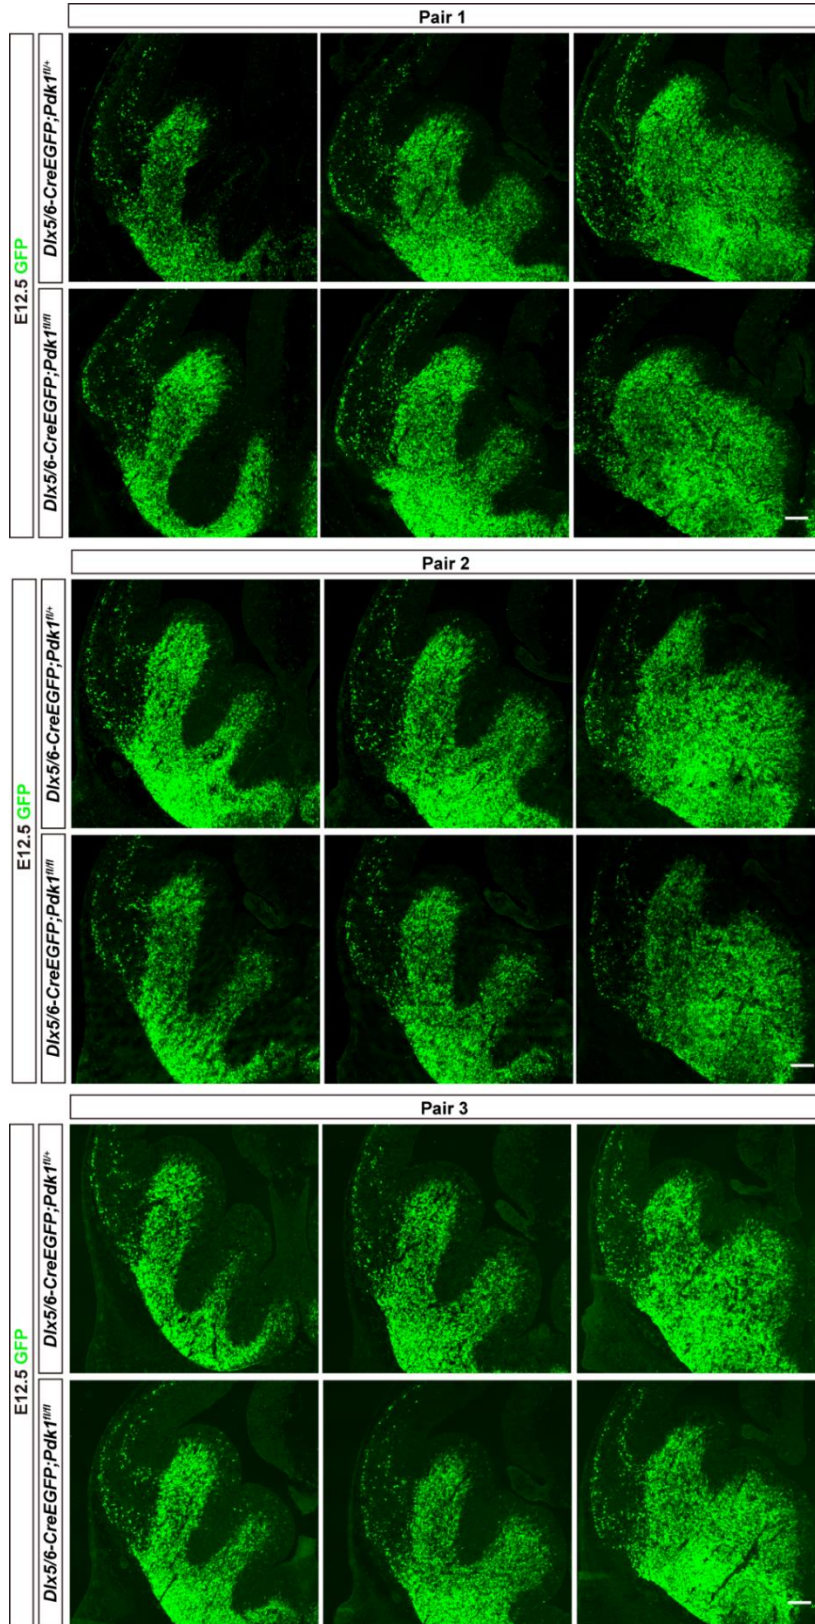

**Figure 2C-D Raw Data.** Immunofluorescence for GFP in coronal sections showed comparable distribution patterns and numbers of cortical interneurons at E13.5 between *Pdk1* cKO and control mice. 4 pair brains from 3 different litters were used for statistical analysis. Quantified data was listed in Raw Data Excel sheet6.  $P = 0.9089$ . Scale bar, 100  $\mu\text{m}$ .

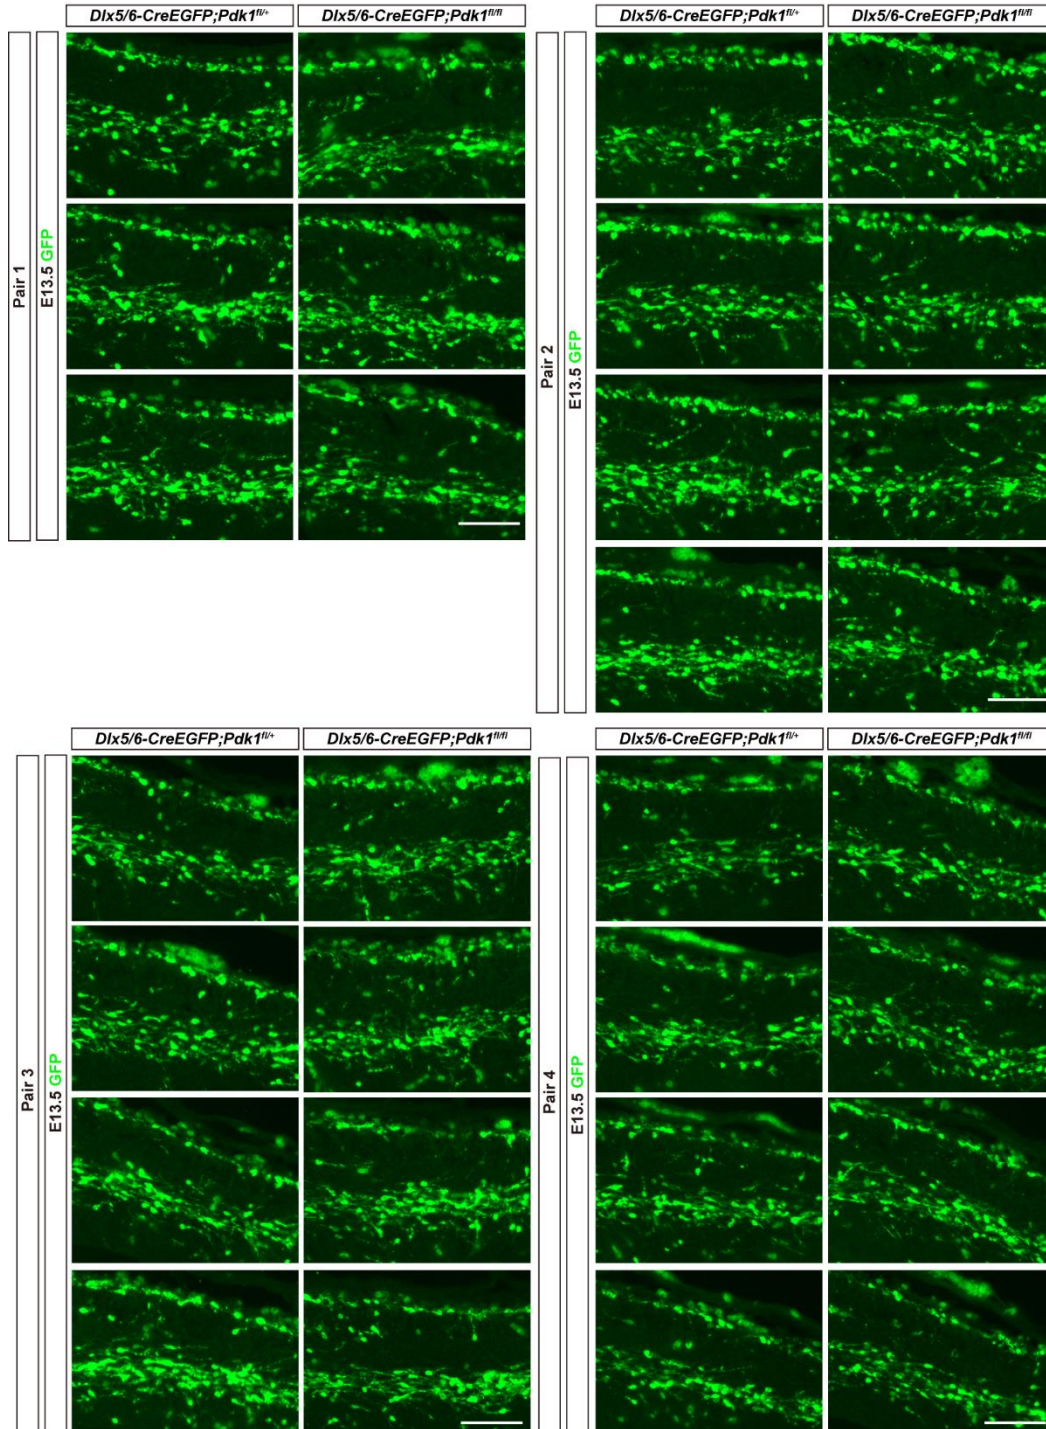

**Figure 2C''-D'' and 2U Raw Data. Raw Data.** There were no significant differences in the dorsal/ventral ratio of numbers of interneurons between *Pdk1* cKO and control mice at E13.5. 4 pair brains from 3 different litters were used for statistical analysis. Quantified data was listed in Raw Data Excel sheet7.  $P = 0.1945$ .

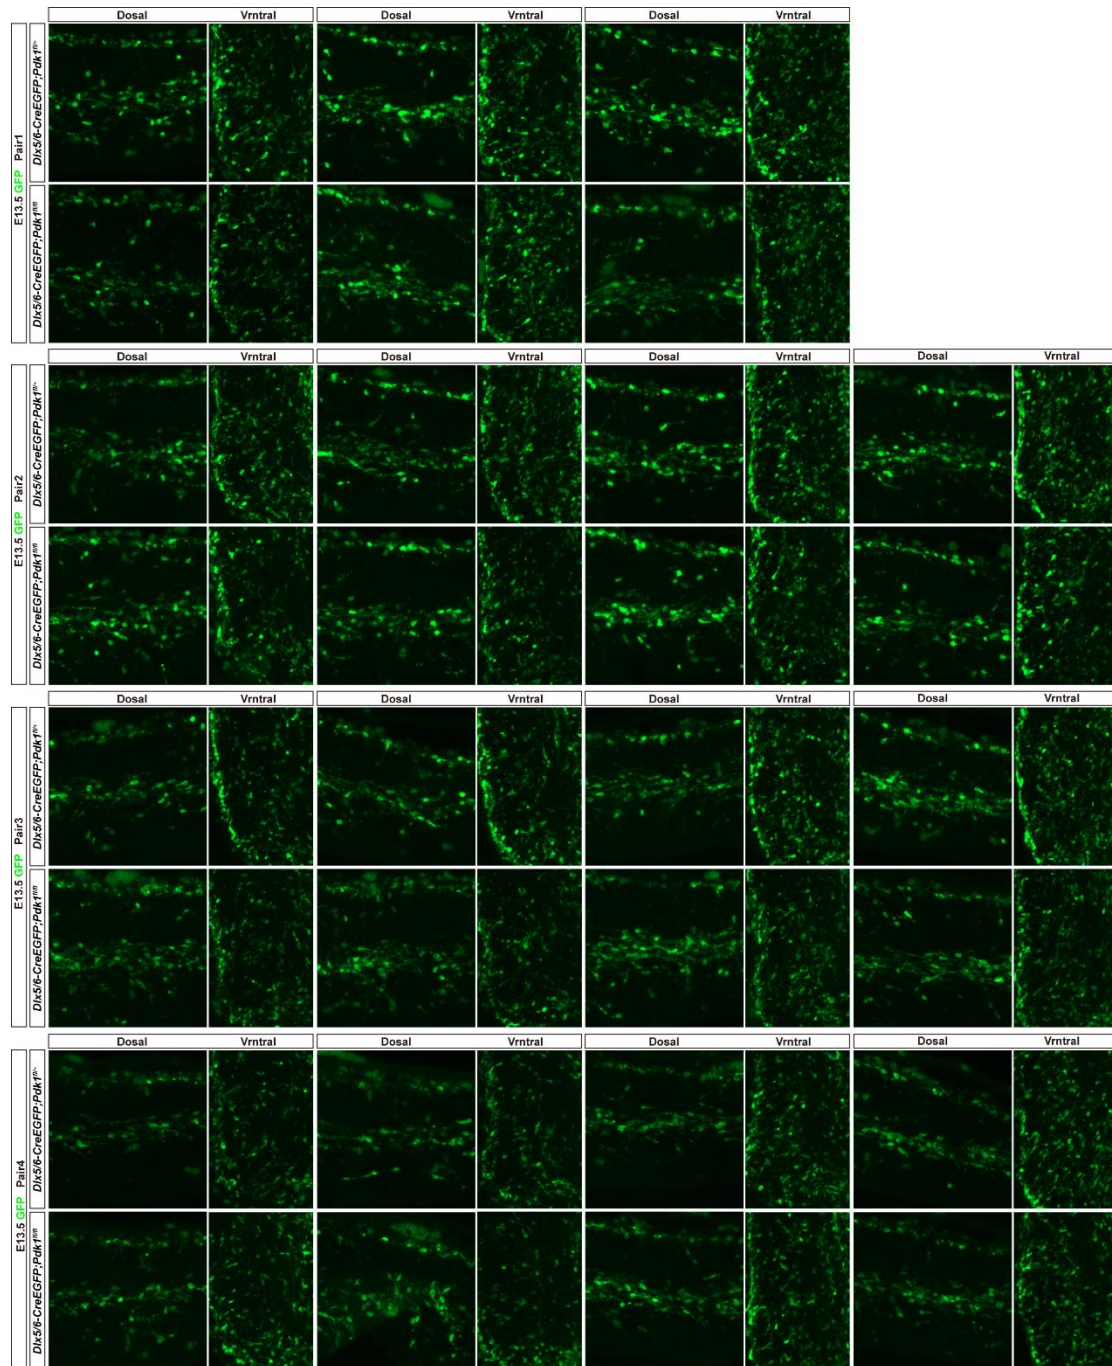

**Figure 2I-J' Raw Data.** The number of GFP<sup>+</sup> cortical interneurons decreased at E18.5 in the *Pdk1* cKO cortex. 3 pair brains from 3 different litters were used for statistical analysis. Quantified data was listed in Raw Data Excel sheet6.  $P = 0.00034$ . Scale bar, 100  $\mu\text{m}$ .

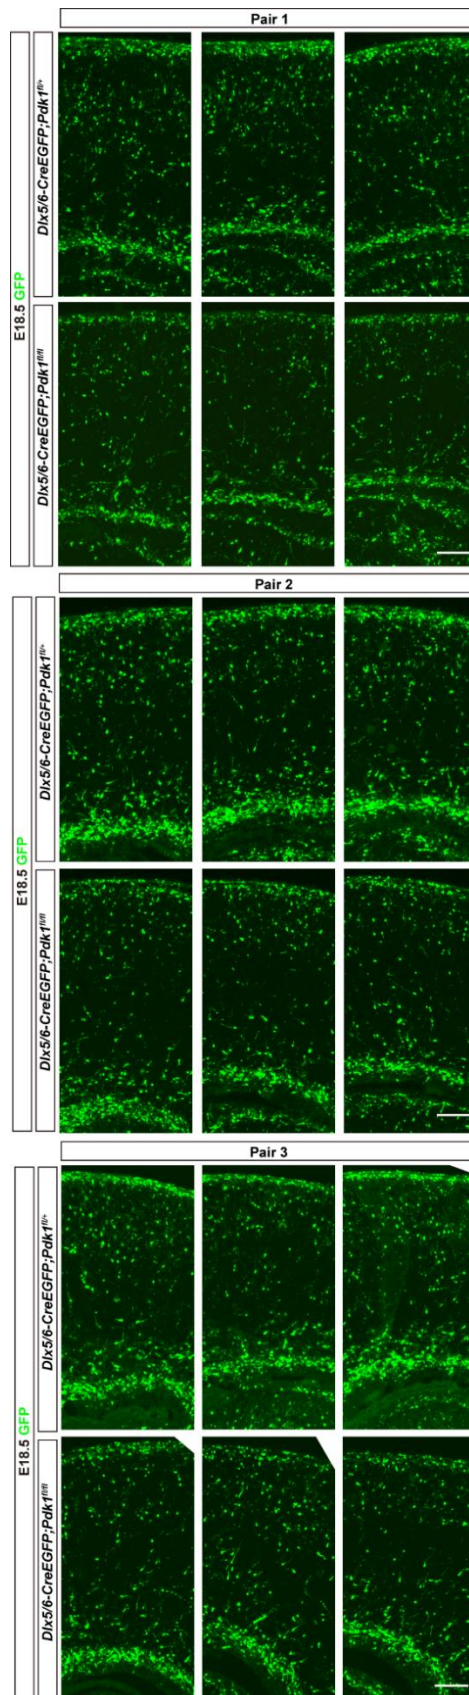



**Figure 2I''-J'' and 2U Raw Data.** There were no significant differences in the dorsal/ventral ratio of numbers of interneurons between *Pdk1* cKO and control mice at E18.5. 3 pair brains from 3 different litters were used for statistical analysis. Quantified data was listed in Raw Data Excel sheet7.  $P = 0.5371$ .

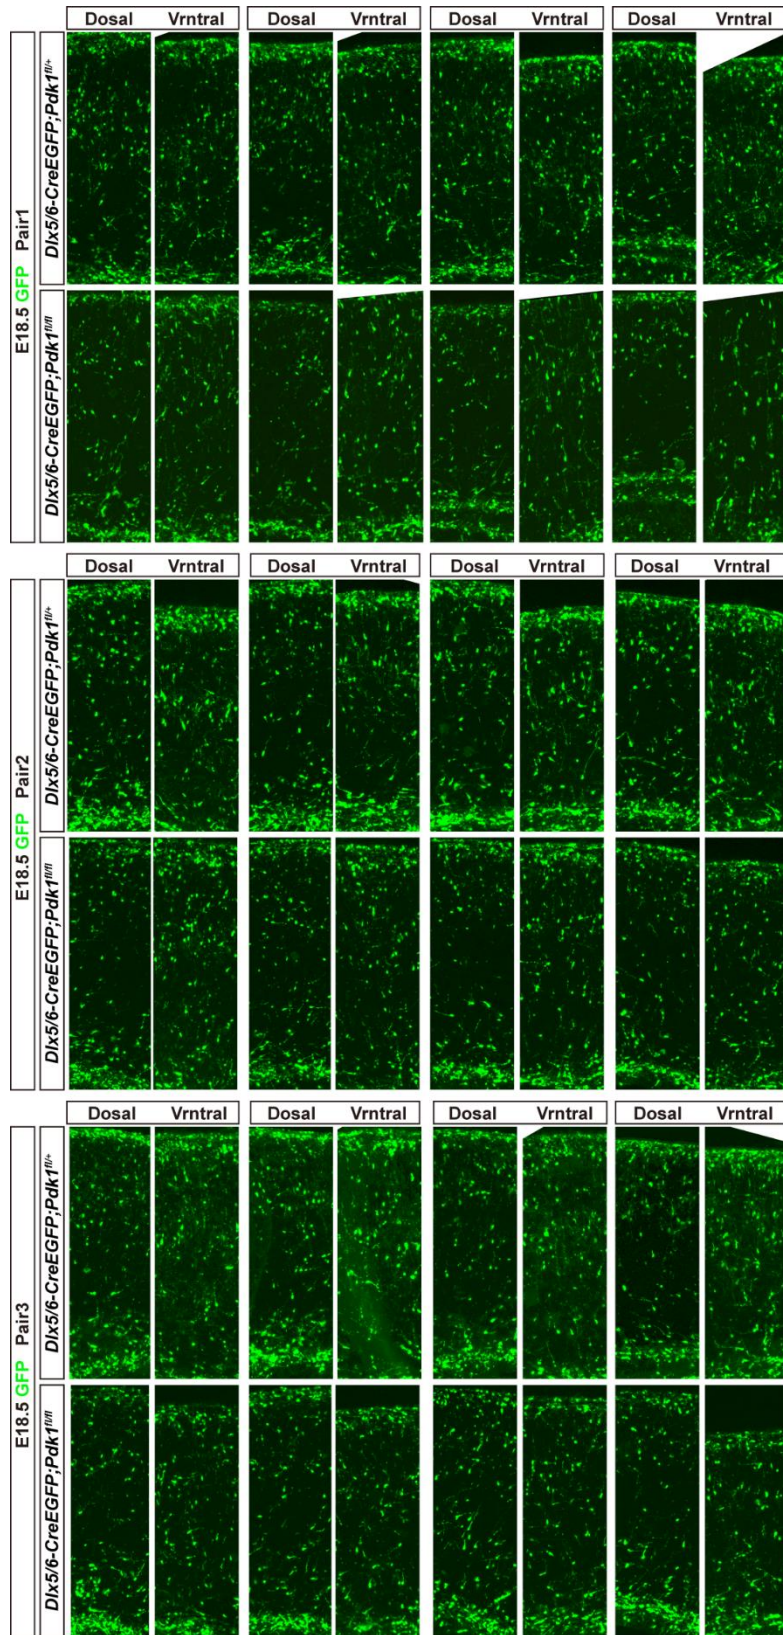

**Figure 2K-L' Raw Data.** In situ hybridization showed that the number of SST<sup>+</sup> interneurons decreased at E14.5 in the *Pdk1* cKO subpallium. 3 pair brains from 3 different litters were used for statistical analysis. Quantified data was listed in Raw Data Excel sheet8.  $P = 0.00045$ . Scale bar, 100  $\mu$ m.

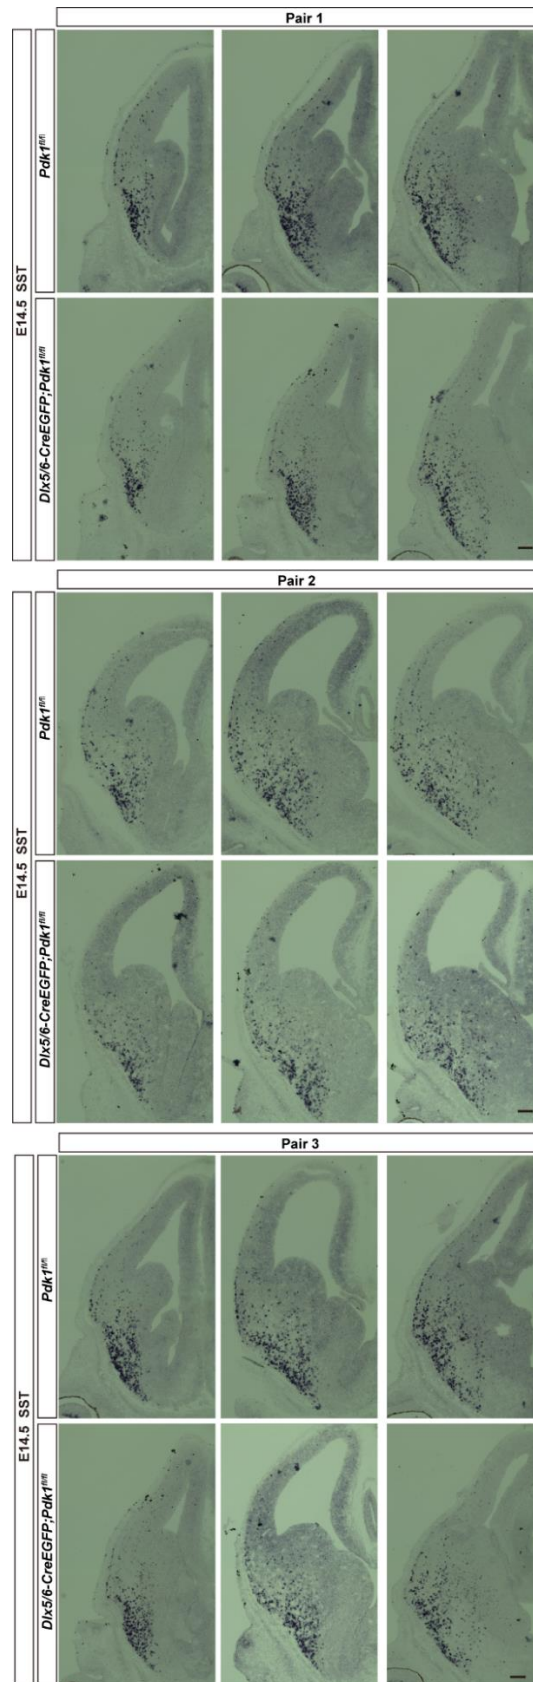

**Figure 2M-N Raw Data.** The number of SST<sup>+</sup> interneurons in the *Pdk1* cKO was decreased at E16.5. 3 pair brains from 3 different litters were used for analysis.

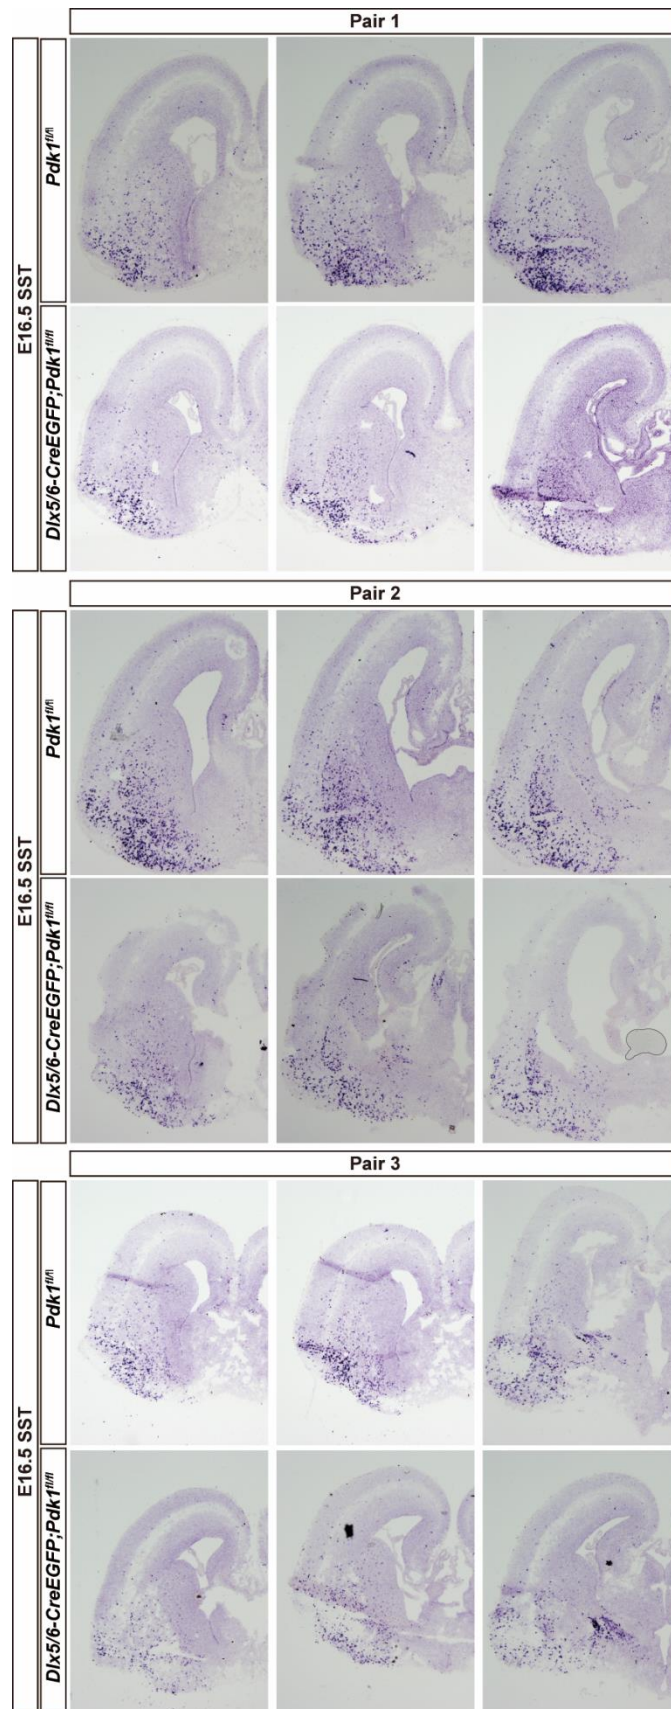

**Figure 20-P' Raw Data.** The number of SST<sup>+</sup> interneurons in the *Pdk1* cKO cortex was decreased at E18.5. 3 pair brains from 3 different litters were used for statistical analysis. Quantified data was listed in Raw Data Excel sheet8.  $P = 0.00015$ . Scale bar, 100  $\mu$ m.

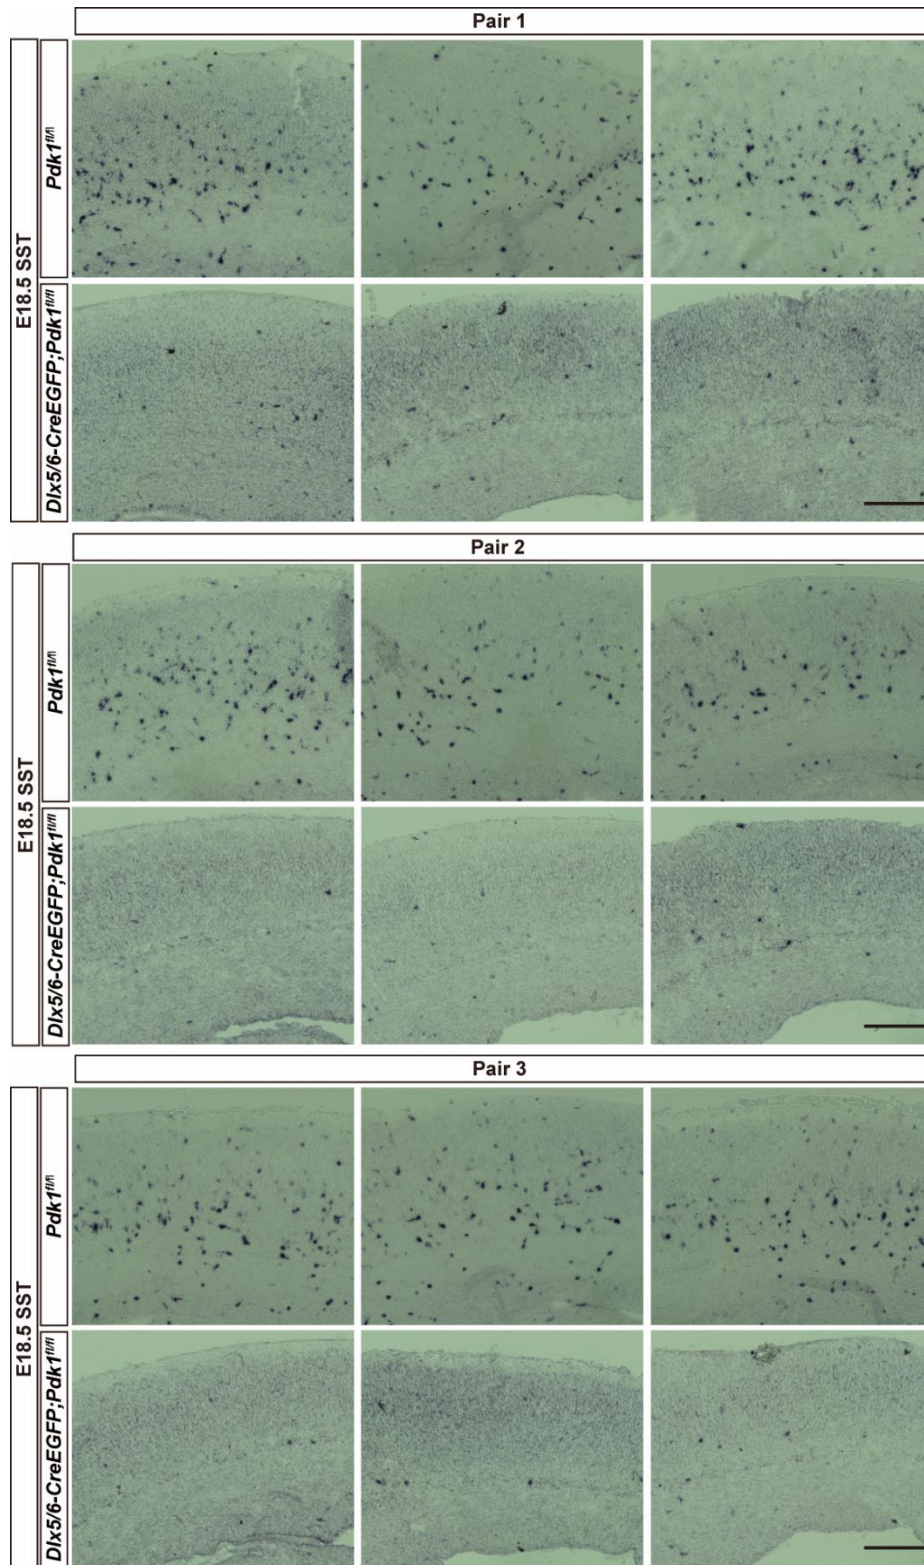

**Figure 2Q-R' Raw Data.** Immunofluorescence for PROX1 showed that the number of PROX1<sup>+</sup> cortical interneurons was decreased in the *Pdk1* cKO cortex at E18.5. 3 pair brains from 3 different litters were used for statistical analysis. Quantified data was listed in Raw Data Excel sheet9. *P* = 0.0018. Scale bar, 100  $\mu$ m.

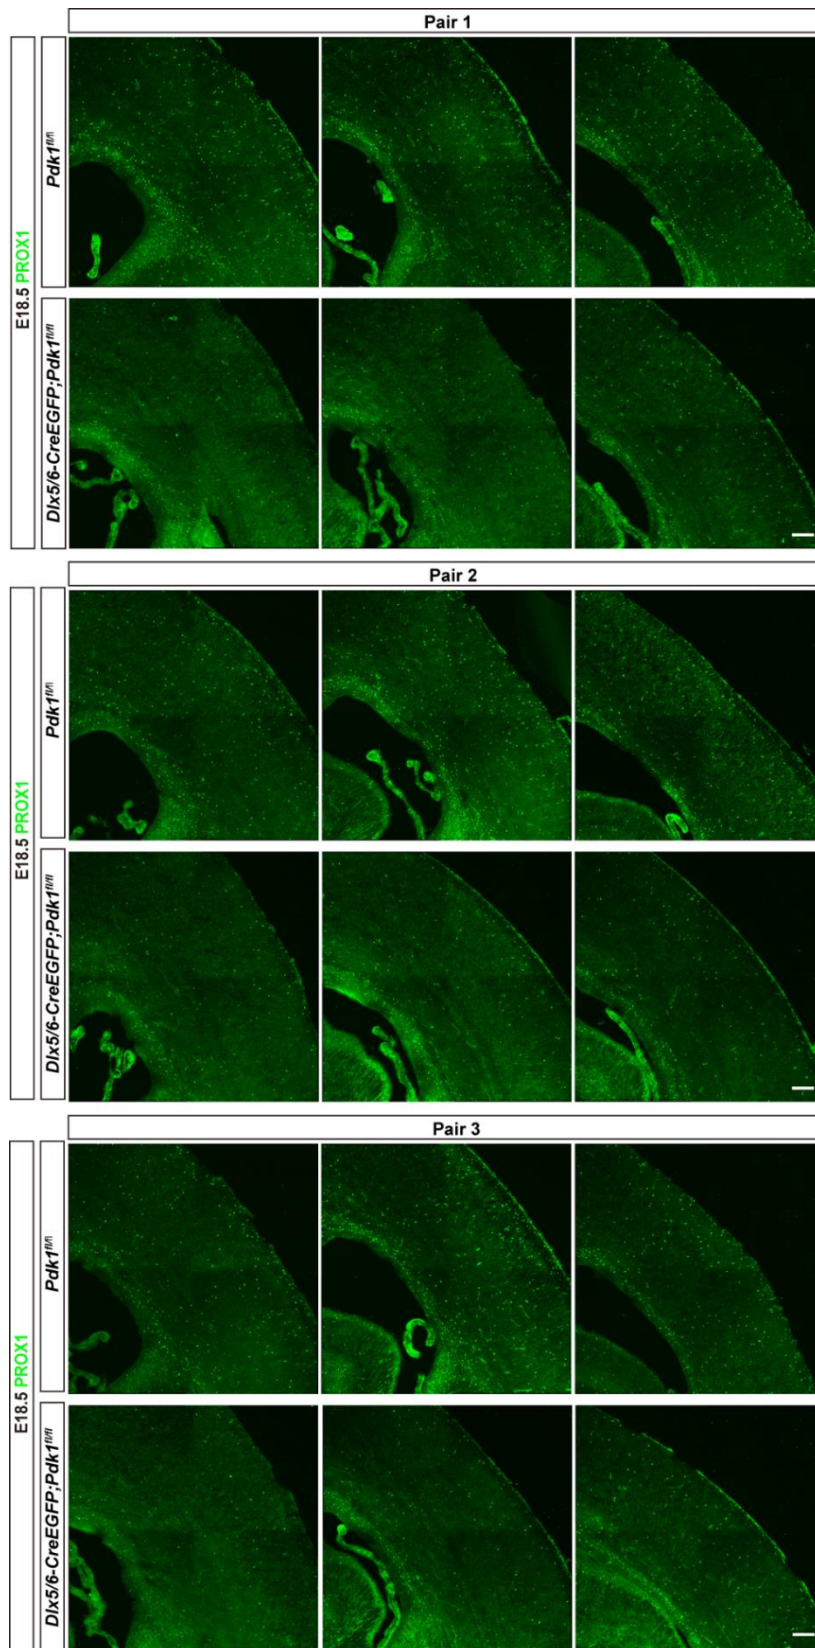

**Figure 4A-B Raw Data.** Immunofluorescence for PH3 showed that the number of PH3-labeled M phase cells was unaffected in the MGE of *Pdk1* cKO mice compared with control mice at E12.5. 3 pair brains from 3 different litters were used for statistical analysis. Quantified data was listed in Raw Data Excel sheet10.  $P = 0.7922$ . Scale bar, 100  $\mu\text{m}$ .

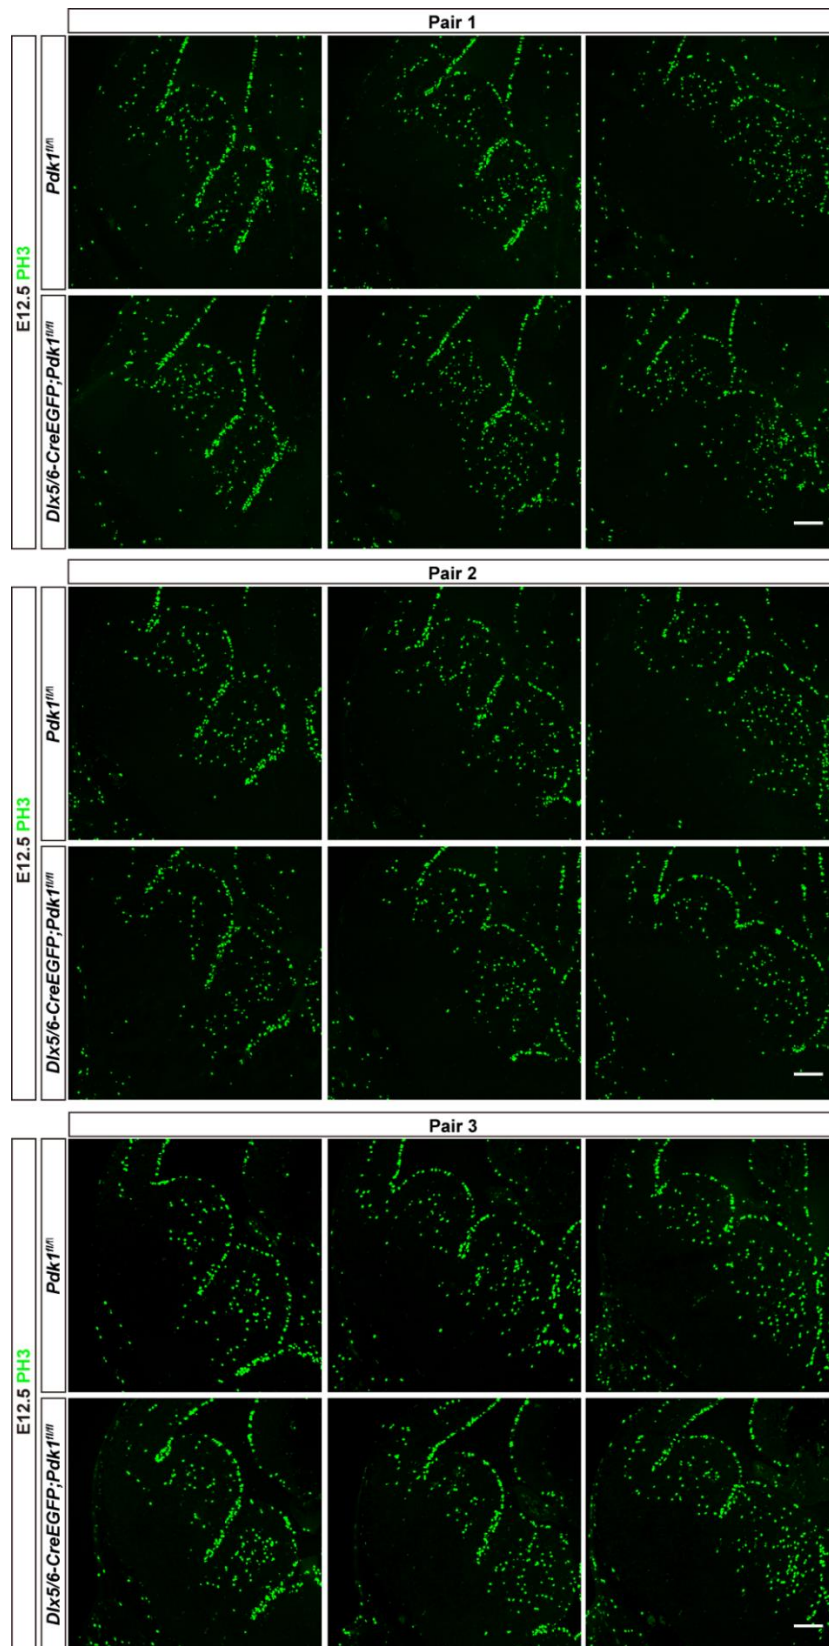

**Figure 4C-D Raw Data.** Immunofluorescence for PH3 showed that the number of PH3-labeled M phase cells was unaffected in the MGE of *Pdk1* cKO mice compared with control mice at E14.5. 3 pair brains from 3 different litters were used for statistical analysis. Quantified data was listed in Raw Data Excel sheet10.  $P > 0.99999$ . Scale bar, 100  $\mu\text{m}$ .

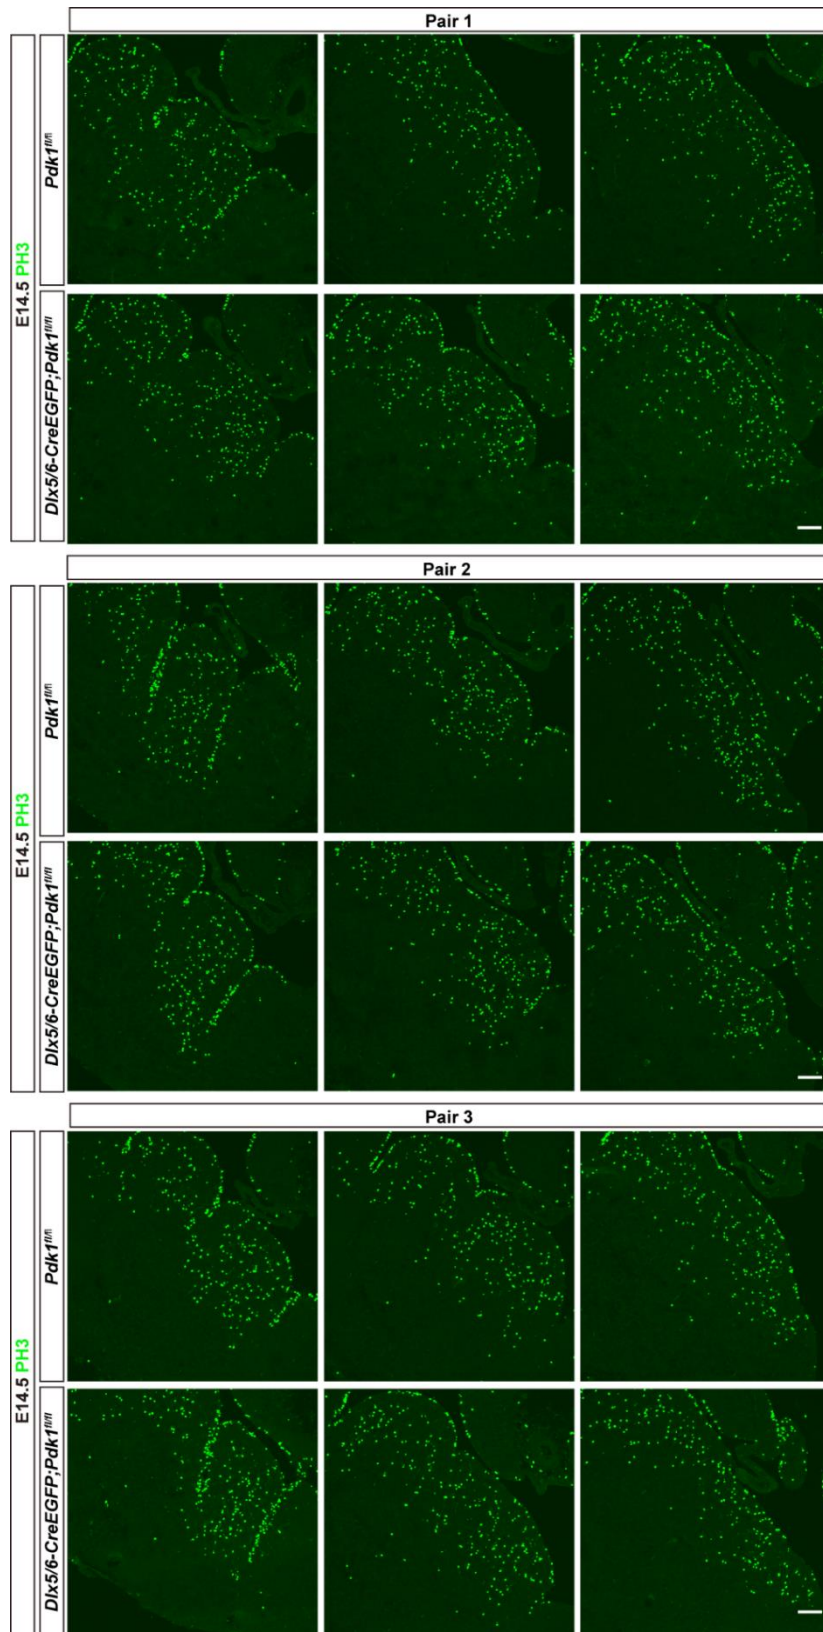

**Figure 4E-F Raw Data.** Immunofluorescence for PH3 showed that the number of PH3-labeled M phase cells was unaffected in the MGE of *Pdk1* cKO mice compared with control mice at E16.5. 3 pair brains from 3 different litters were used for statistical analysis. Quantified data was listed in Raw Data Excel sheet10.  $P = 0.5767$ . Scale bar, 100  $\mu\text{m}$ .

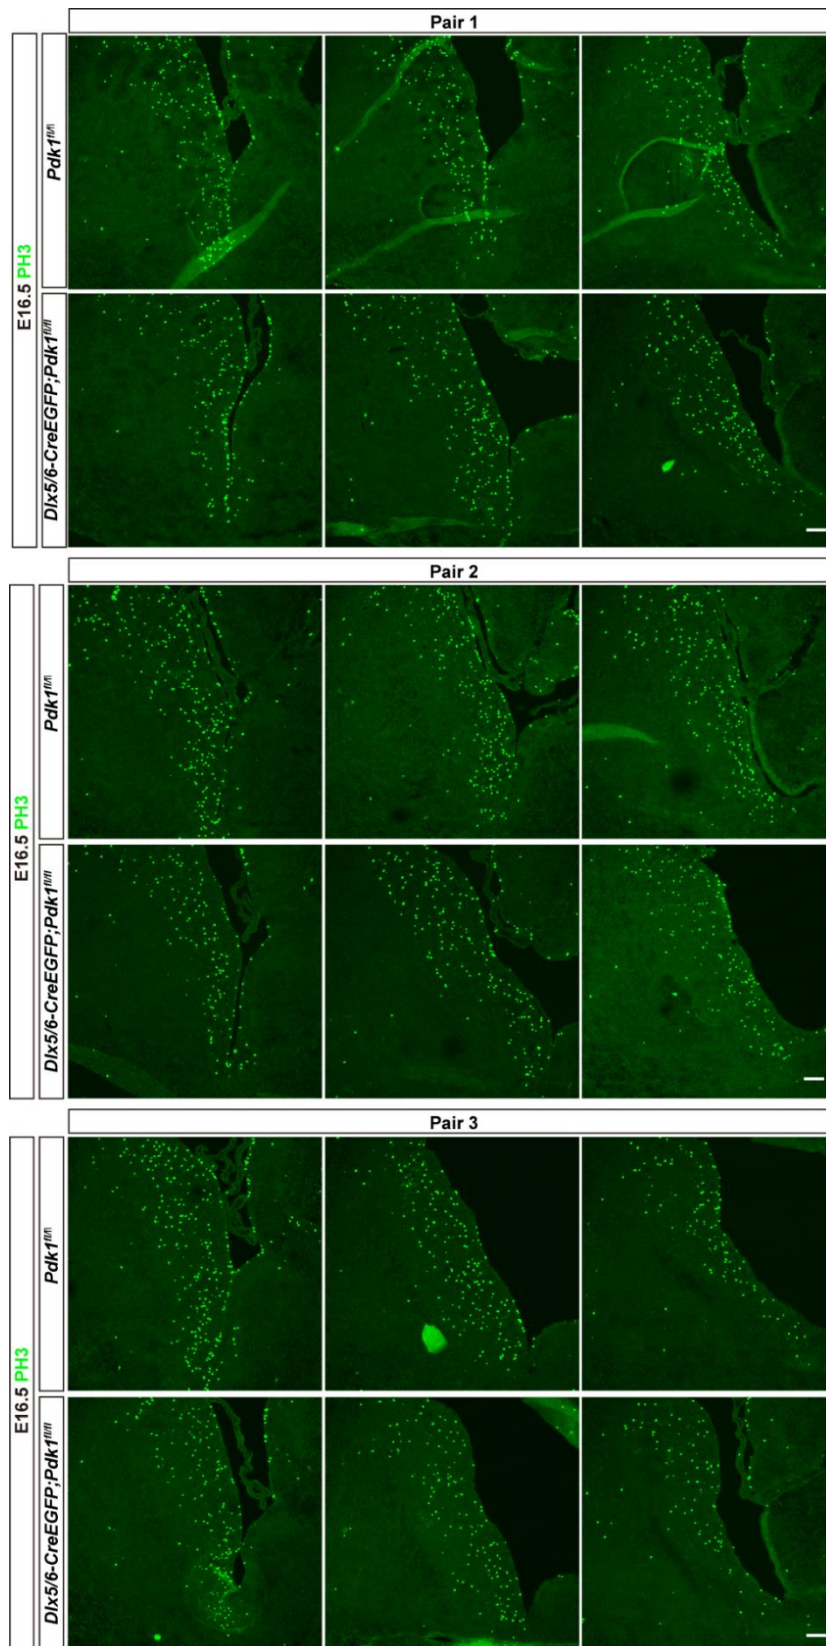



**Figure 4G-H Raw Data.** Immunofluorescence for BrdU showed that the number of S phase cells within the *Pdk1* cKO MGE was similar to that in the control MGE at E12.5. 3 pair brains from 3 different litters were used for statistical analysis. Quantified data was listed in Raw Data Excel sheet11.  $P = 0.9502$ . Scale bar, 100  $\mu\text{m}$ .

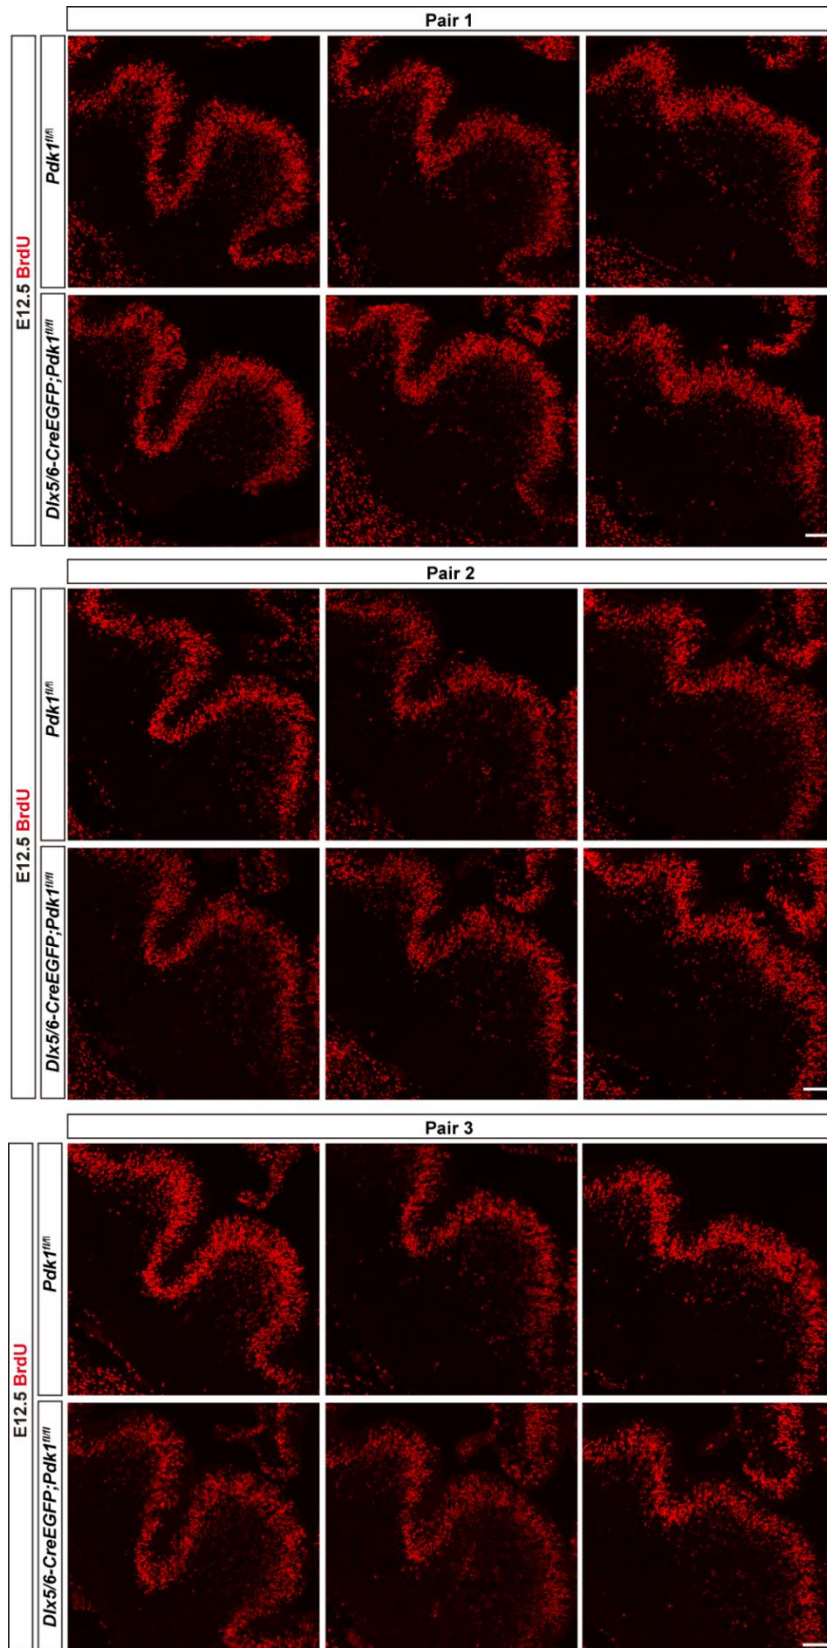

**Figure 4I-J Raw Data.** Immunofluorescence for BrdU showed that the number of S phase cells within the *Pdk1* cKO MGE was similar to that in the control MGE at E14.5. 3 pair brains from 3 different litters were used for statistical analysis. Quantified data was listed in Raw Data Excel sheet11.  $P = 0.9265$ . Scale bar, 100  $\mu\text{m}$ .

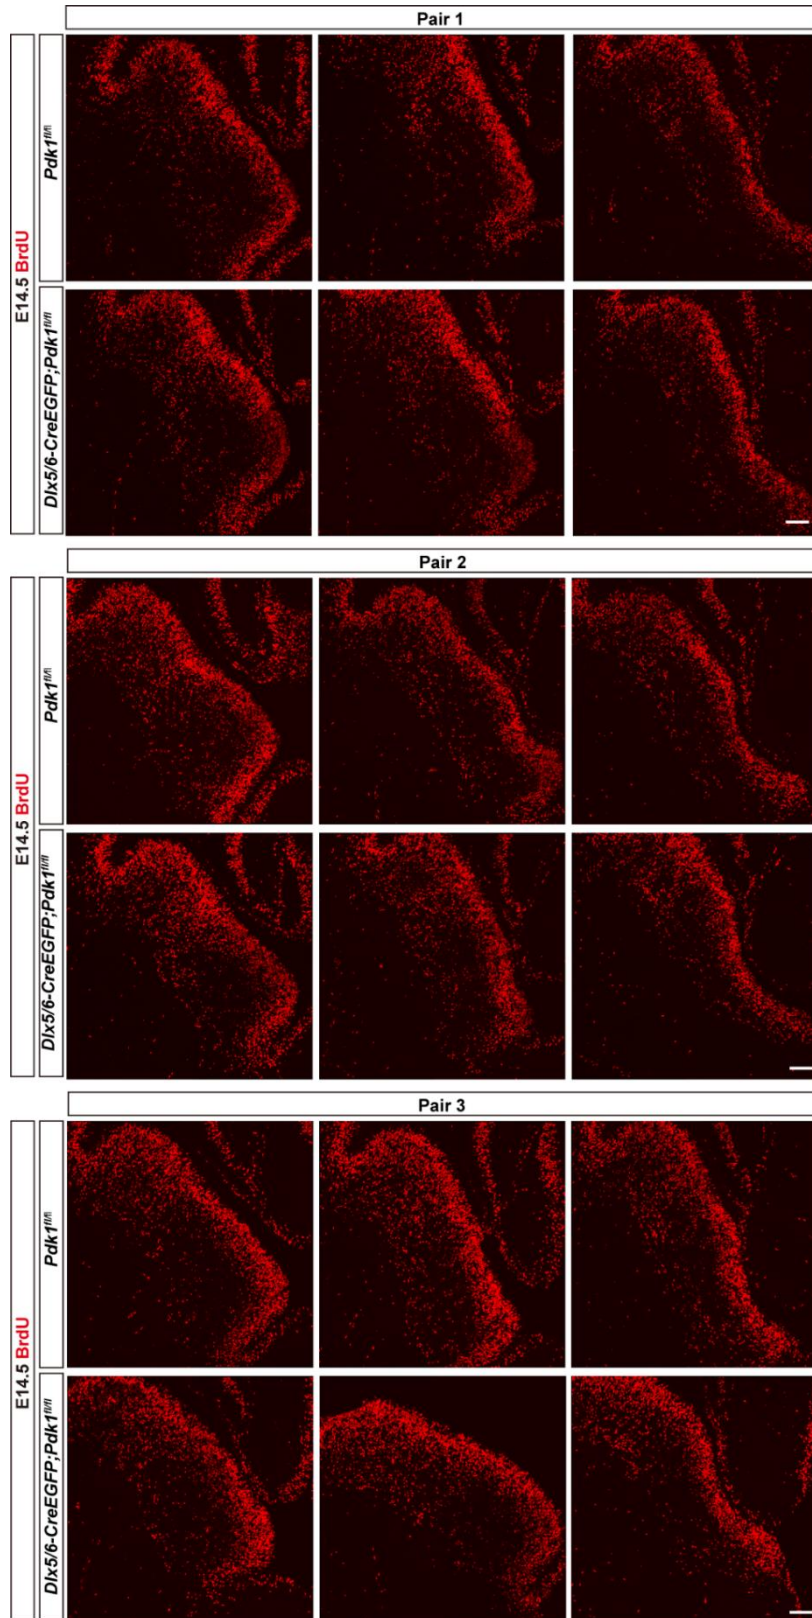

**Figure 4K-L' Raw Data.** Immunofluorescence for BrdU showed that the number of S phase cells within the *Pdk1* cKO MGE was similar to that in the control MGE at E16.5. 5 pair brains from 3 different litters were used for statistical analysis. Quantified data was listed in Raw Data Excel sheet11.  $P = 0.7189$ . Scale bar, 100  $\mu\text{m}$ .

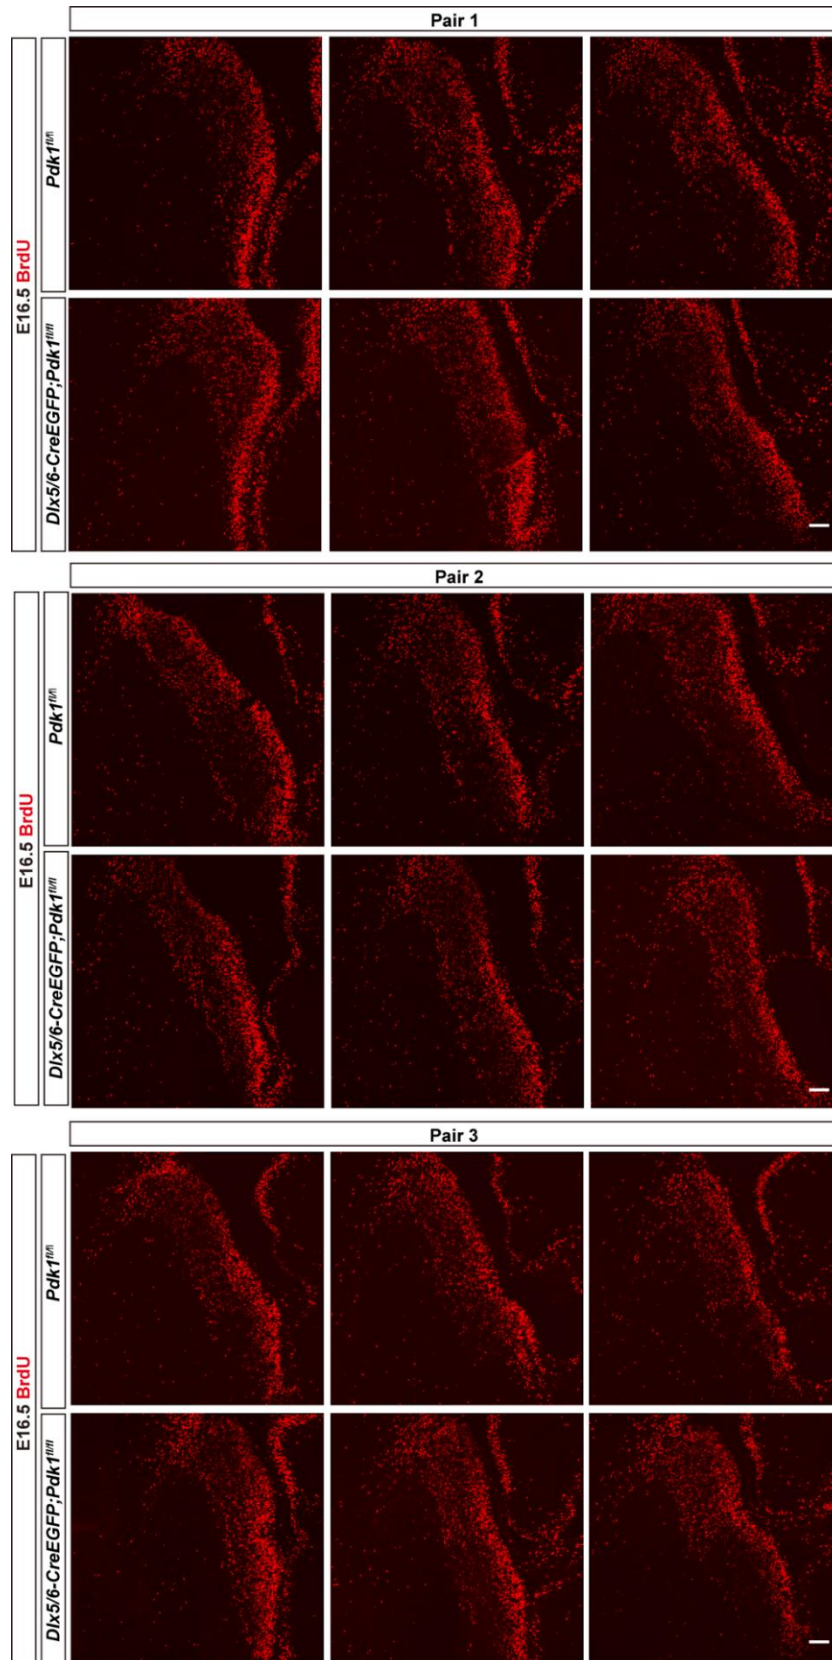

**Figure 4M-N Raw Data.** Immunofluorescence for Ki67 revealed comparable numbers of Ki67<sup>+</sup> cells between *Pdk1* cKO and control mice at E12.5. 3 pair brains from 3 different litters were used for statistical analysis. Quantified data was listed in Raw Data Excel sheet12.  $P = 0.9954$ . Scale bar, 100  $\mu\text{m}$ .

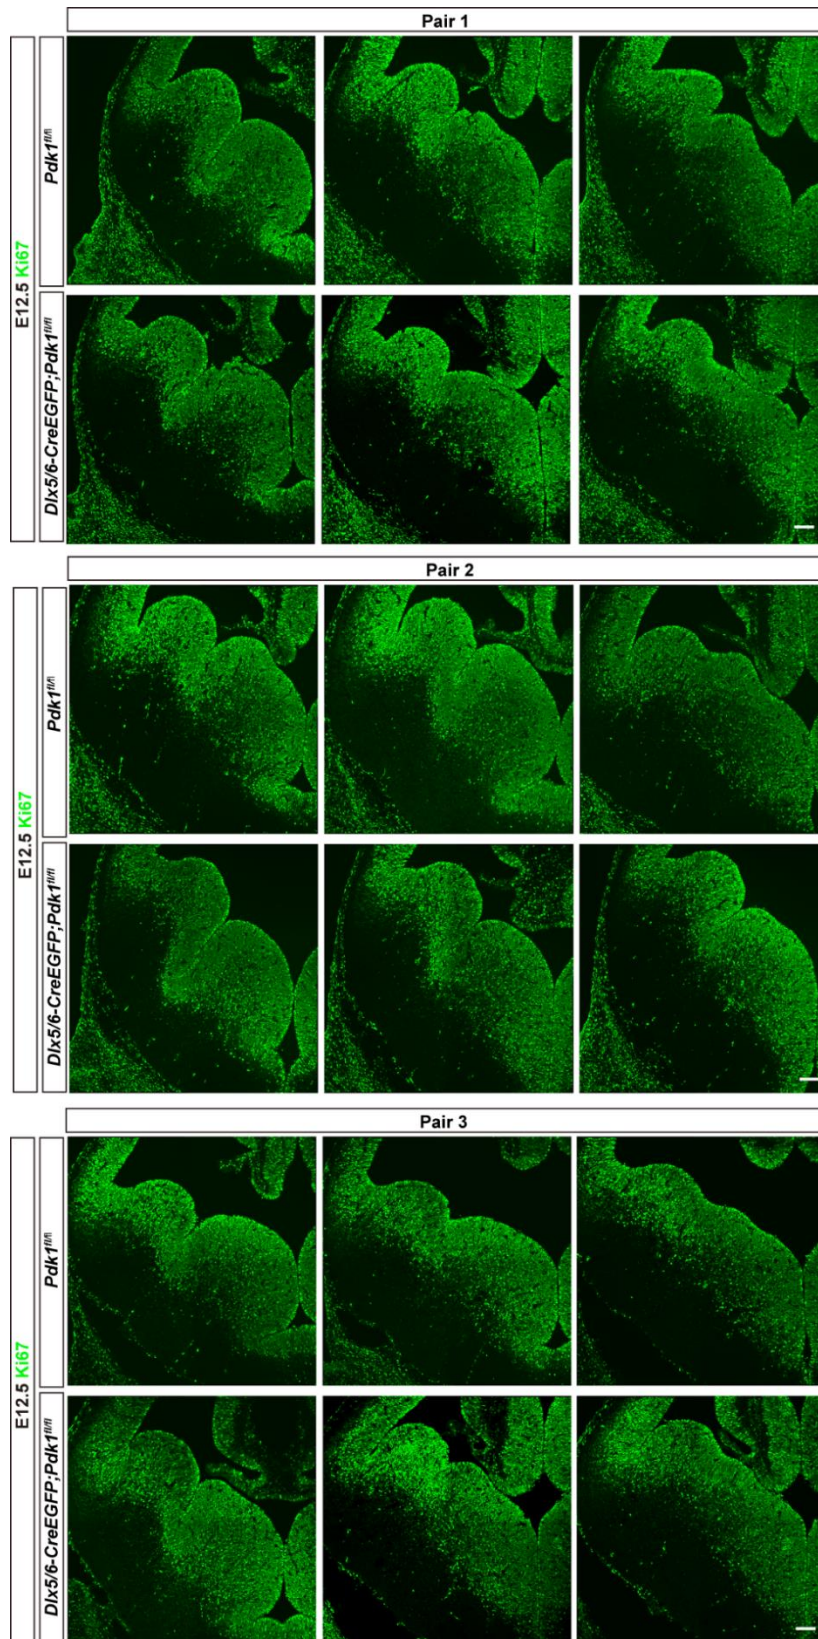

**Figure 40-P Raw Data.** Immunofluorescence for Ki67 revealed comparable numbers of Ki67<sup>+</sup> cells between *Pdk1* cKO and control mice at E14.5. 4 pair brains from 3 different litters were used for statistical analysis. Quantified data was listed in Raw Data Excel sheet12.  $P = 0.8033$ . Scale bar, 100  $\mu\text{m}$ .

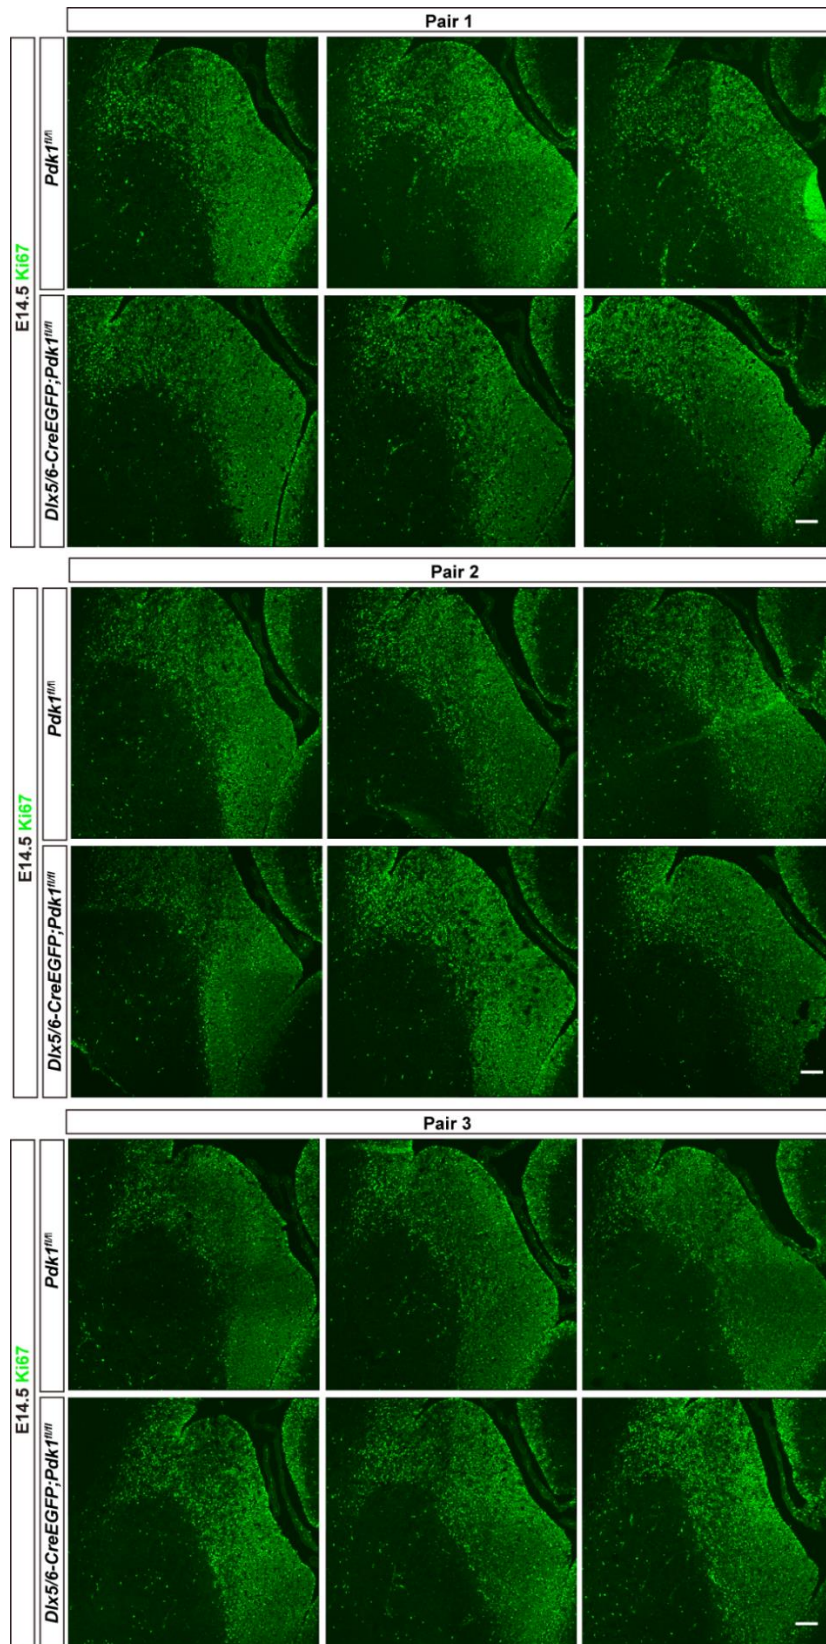

**Figure 4Q-R' Raw Data.** Immunofluorescence for Ki67 revealed comparable numbers of Ki67<sup>+</sup> cells between *Pdk1* cKO and control mice at E16.5. 6 pair brains from 4 different litters were used for statistical analysis. Quantified data was listed in Raw Data Excel sheet12.  $P = 0.9003$ . Scale bar, 100  $\mu\text{m}$ .

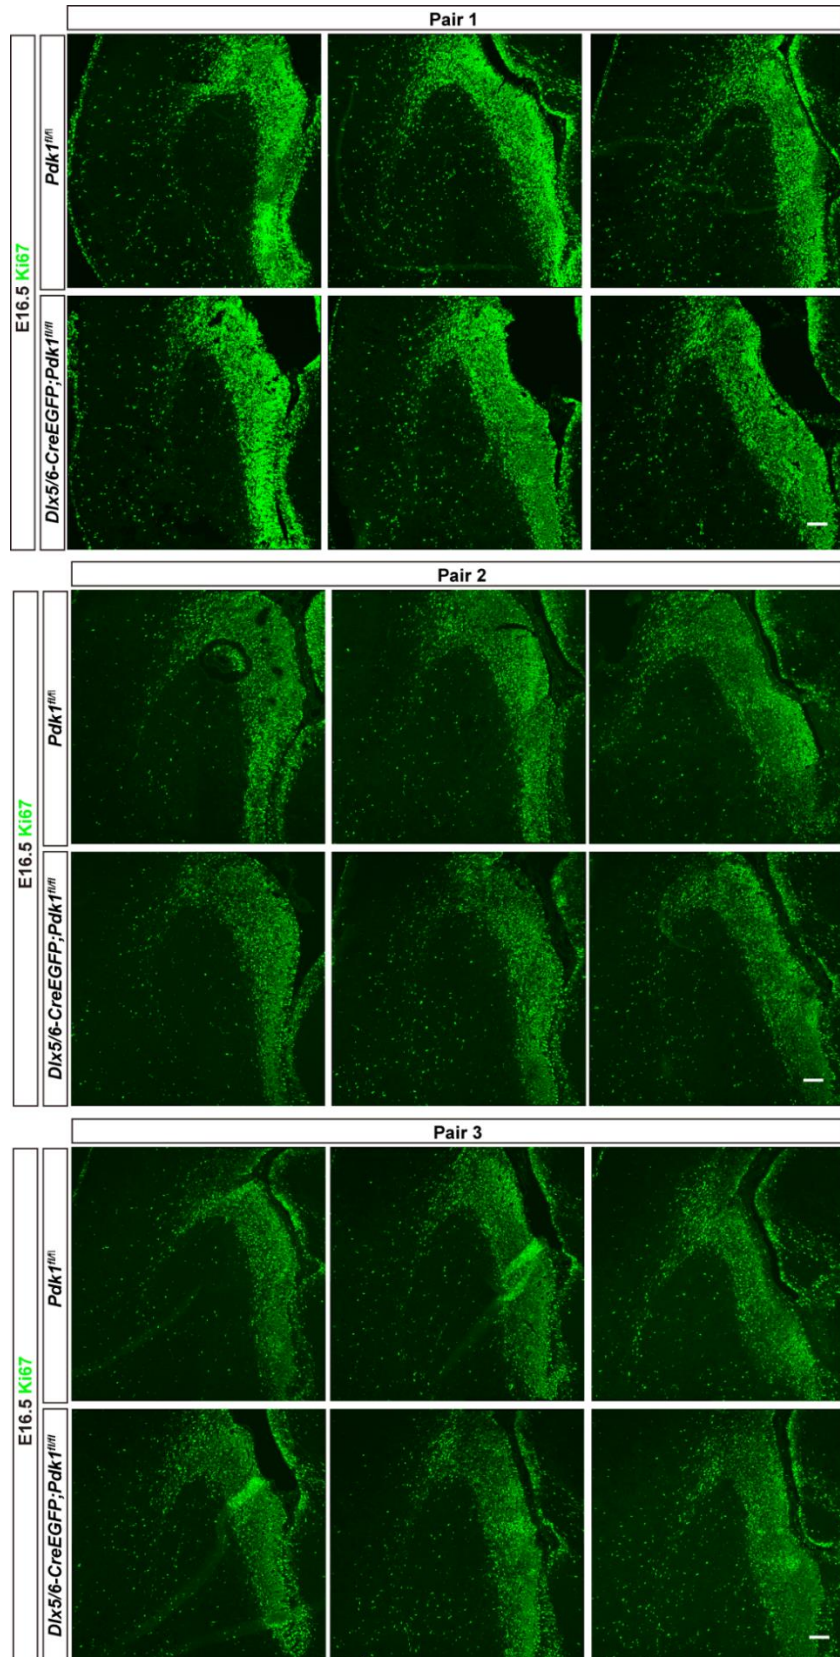

**Figure 5A-B' Raw Data.** Immunofluorescence showing that the number of Caspase-3<sup>+</sup> cells was no differences in the subpallium of *Pdk1* cKO and control mice at E12.5. 3 pair brains from 3 different litters were used for statistical analysis. Quantified data was listed in Raw Data Excel sheet13. *P* = 0.9231. Scale bar, 100  $\mu$ m.

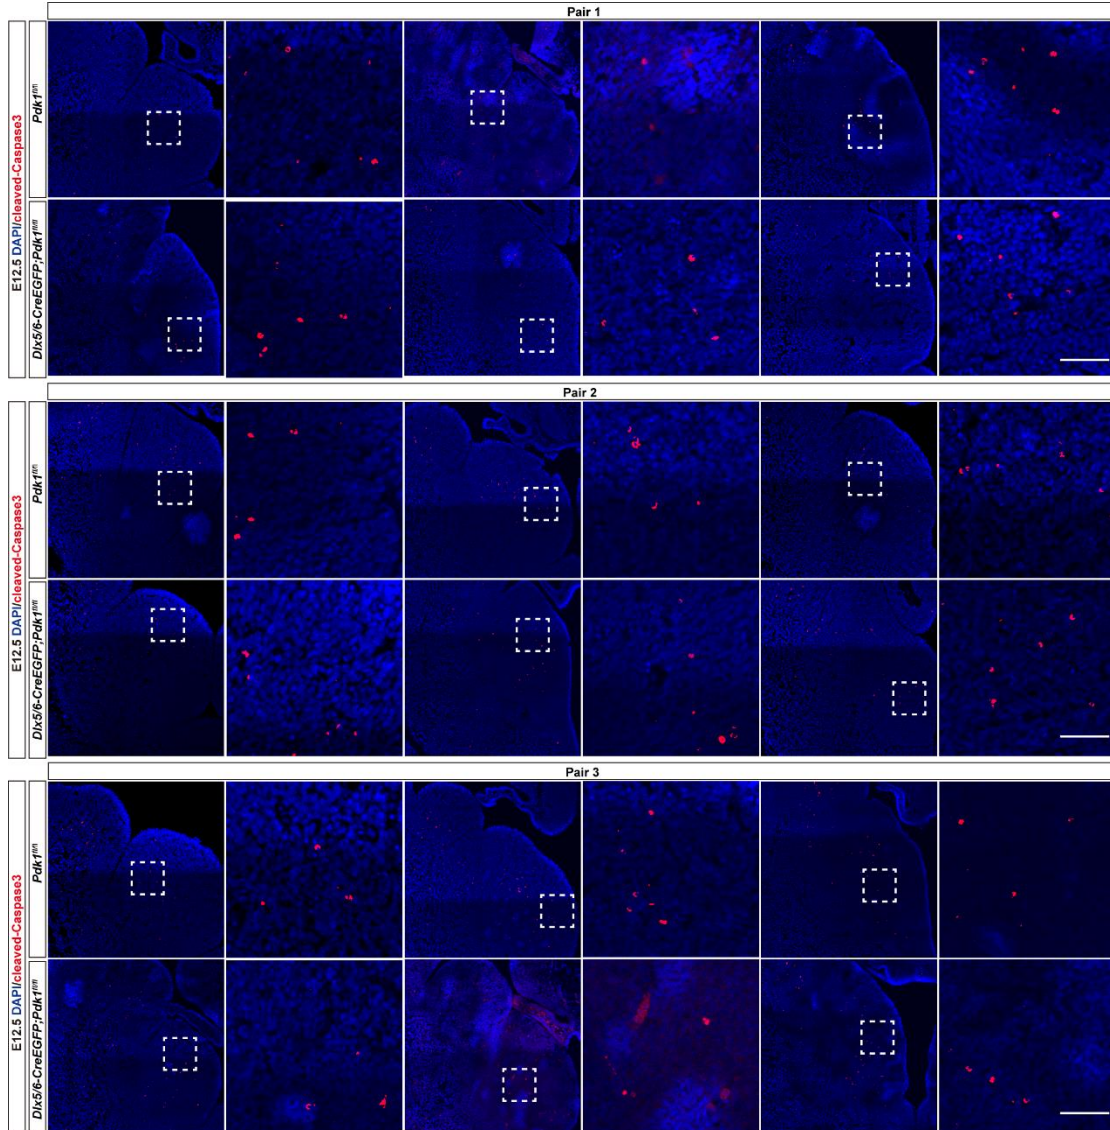

**Figure 5C-D' Raw Data.** The number of Caspase-3<sup>+</sup> cells was significantly increased in the subpallium of *Pdk1* cKO compared with control mice at E14.5. 3 pair brains from 3 different litters were used for statistical analysis. Quantified data was listed in Raw Data Excel sheet13.  $P = 0.0048$ . Scale bar, 100  $\mu\text{m}$ .

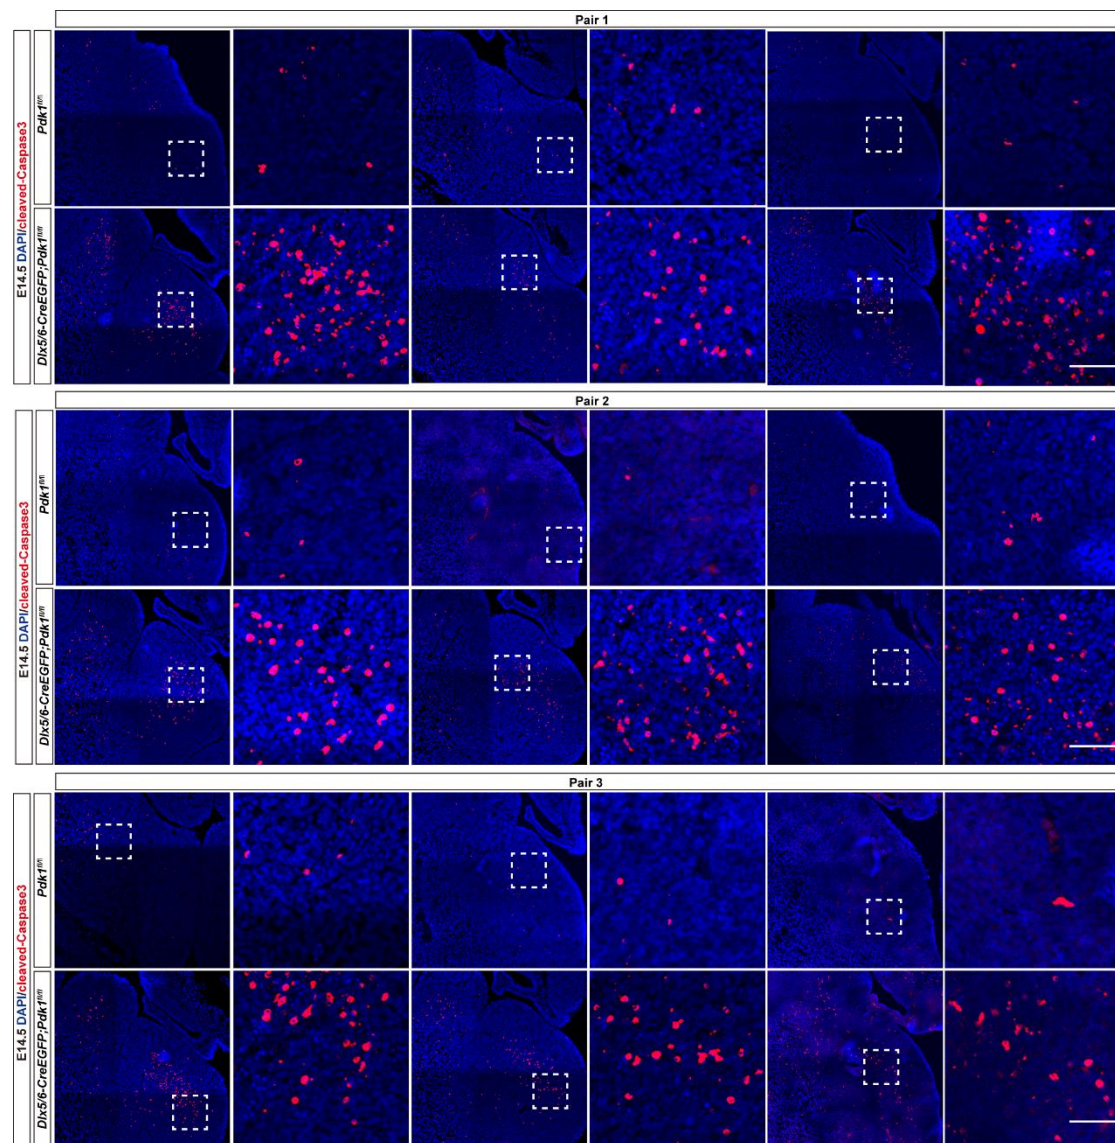



**Figure 5E-F' Raw Data.** Increased number of Caspase-3<sup>+</sup> cells in the subpallium of *Pdk1* cKO mice compared to control mice at E16.5. 3 pair brains from 3 different litters were used for statistical analysis. Quantified data was listed in Raw Data Excel sheet13.  $P = 0.0114$ . Scale bar, 100  $\mu\text{m}$ .

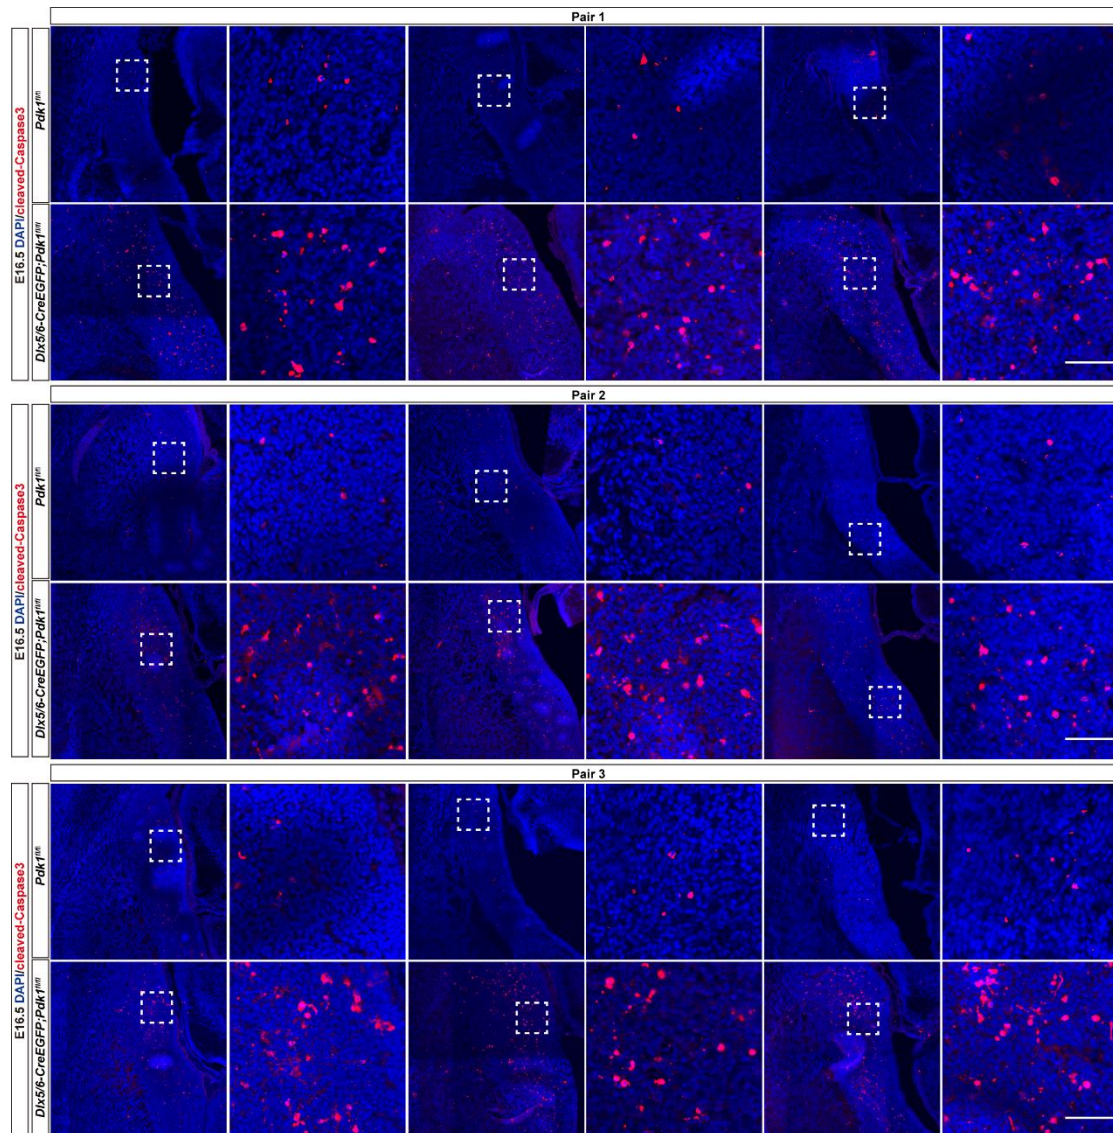

**Figure 5G-H' Raw Data.** Immunofluorescence for Caspase-3 showed that the number of Caspase-3<sup>+</sup> cells was increased in the cortex of *Pdk1* cKO mice compared with control mice at P6. 3 pair brains from 3 different litters were used for statistical analysis. Quantified data was listed in Raw Data Excel sheet13.  $P=0.000037$ . Scale bar, 100  $\mu\text{m}$ .

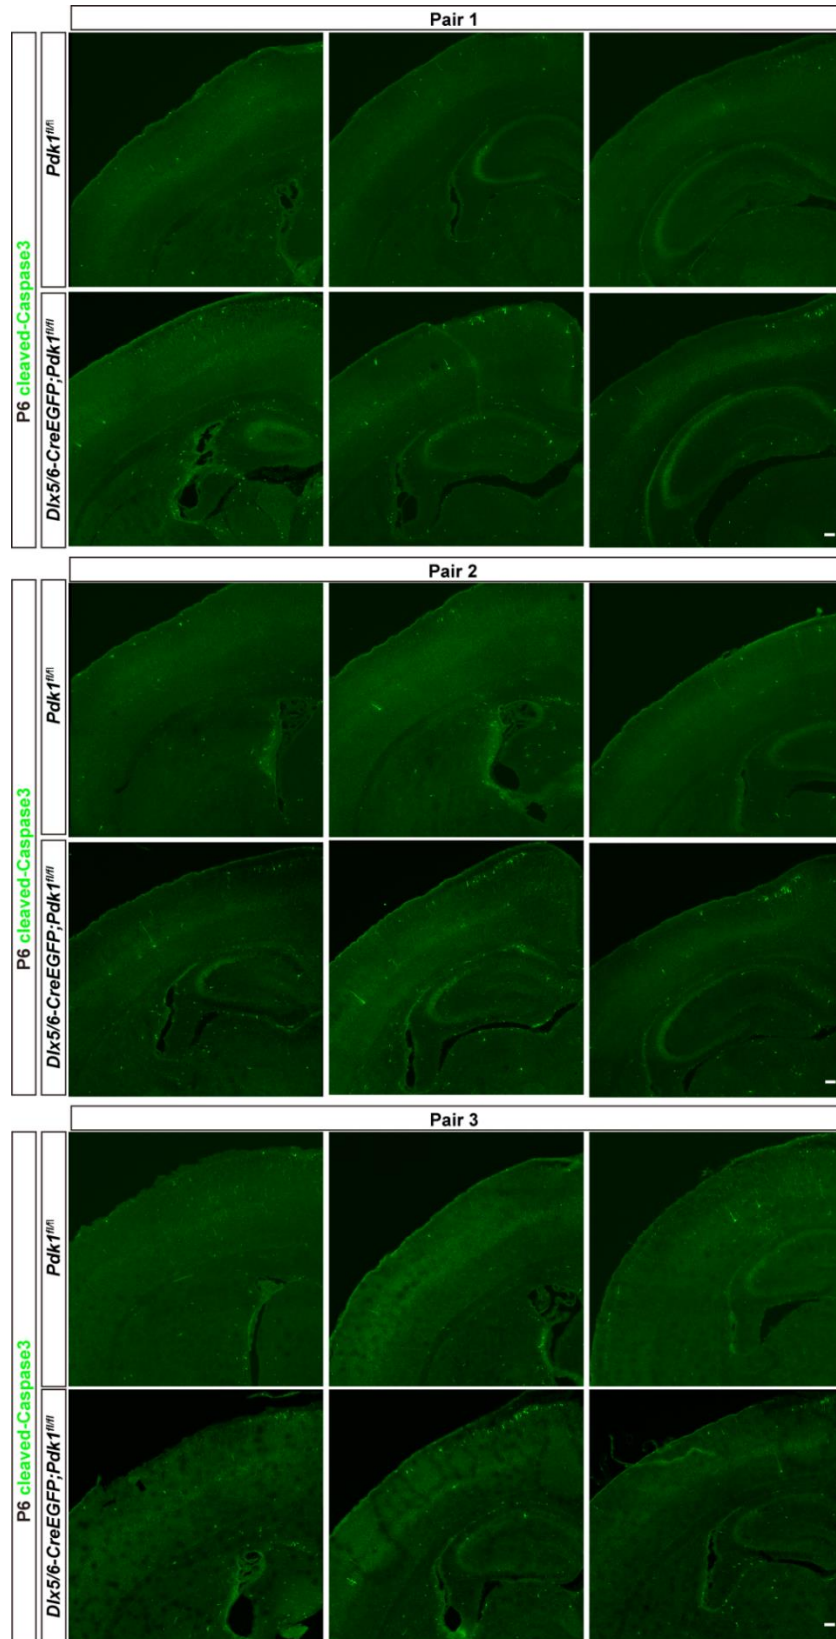

**Figure 6A-B Raw Data.** There were no differences on the relative expression levels of total AKT in the subpallium between *Pdk1* cKO and control mice at E16.5. 4 pair brains from 3 different litters were analyzed. Quantified data for protein expression levels were listed in Raw Data Excel sheet14.  $P = 0.1186$ .

**Figure 6C-D Raw Data.** The relative expression levels of p-AKT<sup>Thr308</sup> was significantly reduced in the subpallium at E16.5. 4 pair brains from 3 different litters were analyzed. Quantified data for protein expression levels were listed in Raw Data Excel sheet15.  $P = 0.0027$ .

**Figure 6E-F Raw Data.** The relative expression levels of p-AKT<sup>Ser473</sup> was obviously increased in the subpallium of *Pdk1* cKO mice compared to control mice at E16.5. 4 pair brains from 3 different litters were analyzed. Quantified data for protein expression levels were listed in Raw Data Excel sheet16.  $P = 0.0153$ .

**Figure 6G-H Raw Data.** There were no significant differences in the relative expression levels of total GSK3 $\beta$  in the subpallium between *Pdk1* cKO and control mice at E16.5. 4 pair brains from 3 different litters were analyzed. Quantified data for protein expression levels were listed in Raw Data Excel sheet17.  $P = 0.5900$ .

**Figure 6I-J Raw Data.** The p-GSK3 $\beta$ <sup>Ser9</sup> level was significantly decreased in the subpallium of *Pdk1* cKOs compared to control mice at E16.5. 4 pair brains from 3 different litters were analyzed. Quantified data for protein expression levels were listed in Raw Data Excel sheet18.  $P = 0.0273$ .

**Figure 6K-L Raw Data.** There were no significant differences in the relative expression levels of PTEN in the subpallium between *Pdk1* cKO and control mice at E16.5. 4 pair brains from 3 different litters were analyzed. Quantified data for protein expression levels were listed in Raw Data Excel sheet 19.  $P = 0.8366$ .

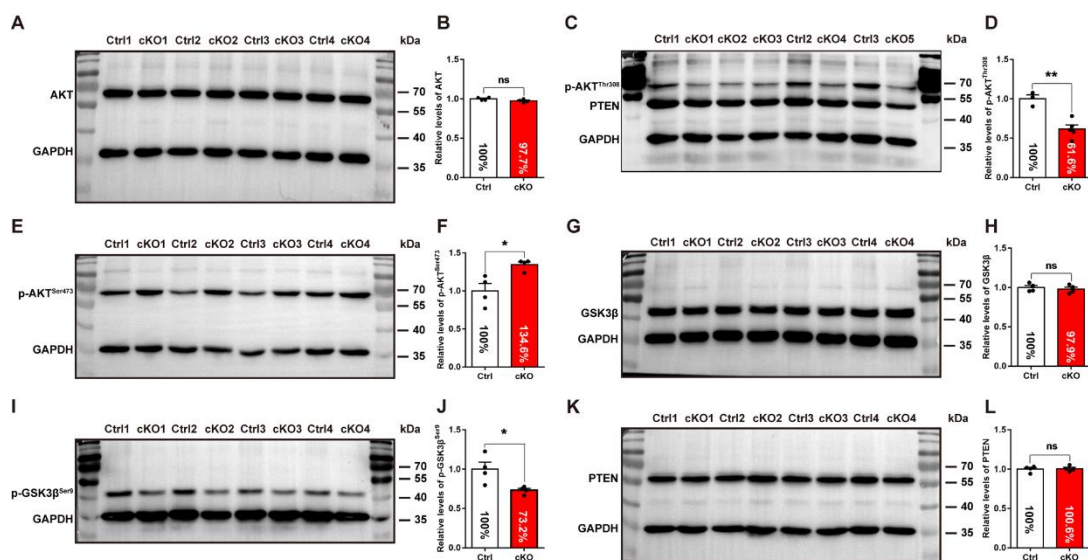

Supplement: 13041_2020_604_MOESM2_ESM.pdf [file 13041_2020_604_MOESM2_ESM.pdf]
